# Supplementary material
Source: publisher figshare collection journal article supplement (https://sage.figshare.com/ndownloader/files/16347527)
Supplement: Supplementary file 1 [file 16347527]

Supplementary table 1: Example search string from Ovid Medline

| Search string                         | Search team                                                                               |
|---------------------------------------|-------------------------------------------------------------------------------------------|
| <b>Free text search</b>               |                                                                                           |
| 1                                     | Heart failure.mp.                                                                         |
| 2                                     | Cardiac failure.mp.                                                                       |
| 3                                     | Congestive heart failure.mp.                                                              |
| 4                                     | Ventric* dysfunction.mp.                                                                  |
| 5                                     | Cardiac dysfunction.mp.                                                                   |
| 6                                     | Systolic dysfunction.mp.                                                                  |
| 7                                     | Cardiac insufficiency.mp.                                                                 |
| 8                                     | Myocardi* insufficiency.mp.                                                               |
| 9                                     | Ventric* insufficiency.mp.                                                                |
| 10                                    | Myocardi* dysfunction.mp.                                                                 |
| 11                                    | Myocardi* failure.mp.                                                                     |
| 12                                    | Ventric* failure.mp.                                                                      |
| 13                                    | HF.mp.                                                                                    |
| 14                                    | CHF.mp.                                                                                   |
| 15                                    | CCF.mp.                                                                                   |
| 16                                    | LVSD.mp.                                                                                  |
| 17                                    | 1 or 2 or 3 or 4 or 5 or 6 or 7 or 8 or<br>9 or 10 or 11 or 12 or 13 or 14 or 15<br>or 16 |
| <b>Medical Subject Heading search</b> |                                                                                           |
| 18                                    | exp Heart failure/                                                                        |
| 19                                    | exp Ventricular dysfunction/ or exp<br>Stroke Volume/ or exp Heart<br>diseases            |

1  
2  
3  
4  
5  
6  
7  
8  
9  
10  
11  
12  
13  
14  
15  
16  
17  
18  
19  
20  
21  
22  
23  
24  
25  
26  
27  
28  
29  
30  
31  
32  
33  
34  
35  
36  
37  
38  
39  
40  
41  
42  
43  
44  
45  
46  
47  
48  
49  
50  
51  
52  
53  
54  
55  
56  
57  
58  
59  
60

|    |                                                                                              |
|----|----------------------------------------------------------------------------------------------|
| 20 | 18 or 19                                                                                     |
|    | Free text search                                                                             |
| 21 | Advanced.mp.                                                                                 |
| 22 | Chronic.mp.                                                                                  |
| 23 | Terminal.mp.                                                                                 |
| 24 | End stage.mp.                                                                                |
| 25 | Moderate.mp.                                                                                 |
| 26 | Severe.mp.                                                                                   |
| 27 | Progressive.mp.                                                                              |
| 28 | Persisitent.mp.                                                                              |
| 29 | Fatal.mp.                                                                                    |
| 30 | Limiting.mp.                                                                                 |
| 31 | Incurable.mp.                                                                                |
| 32 | Unremitting.mp.                                                                              |
| 33 | Decompensated.mp.                                                                            |
| 34 | NYHA class III.mp.                                                                           |
| 35 | NYHA class IV.mp.                                                                            |
| 36 | 21 or 22 or 23 or 24 or 25 or 26 or 27<br>or 28 or 29 or 30 or 31 or 32 or 33 or<br>34 or 35 |
|    | Free text search                                                                             |
| 37 | Palliat*.mp.                                                                                 |
| 38 | Terminal care.mp.                                                                            |
| 39 | Hospice*.mp.                                                                                 |
| 40 | End of life care.mp.                                                                         |
| 41 | Holistic.mp.                                                                                 |

- 42 Respite.mp.
- 43 Supportive care.mp.
- 44 Care of the dying.mp.
- 45 Patient centred care.mp.
- 46 Advance\* care
- 47 Advance\* directive
- 48 37 or 38 or 39 or 40 or 41 or 42 or 43  
or 44 or 45 or 46 or 47

#### Medical Subject Heading search

- 49 exp Palliative care
- 50 exp "Quality of Life"/ or exp  
Palliative Medicine/ or exp Terminal  
Care
- 51 exp Hospices/ or exp Hospice Care/
- 52 exp Holistic Health
- 53 exp Home Nursing/ or exp Respite  
Care/ or Home Care Services/
- 54 exp Patient-Centred Care/
- 55 exp Advance Care planning/
- 56 exp Advance directives/
- 57 49 or 50 or 51 or 52 or 53 or 54 or 55  
or 56

#### Drawing search terms together

- 58 17 or 20
- 59 36 and 58
- 60 48 or 57
- 61 59 and 60

Supplementary table 2: Characteristics of included studies

| First author, year and country | Study setting                                                  | Participants: sample size (n), age (years), sex (%), disease characteristics (NYHA Class, LVEF) |                                 | Intervention and Comparator                                                                                                                                                                                | Outcomes                                                                                                                                                                                                                            | Results                                                                                                                                                                                                                                                                                                                            |
|--------------------------------|----------------------------------------------------------------|-------------------------------------------------------------------------------------------------|---------------------------------|------------------------------------------------------------------------------------------------------------------------------------------------------------------------------------------------------------|-------------------------------------------------------------------------------------------------------------------------------------------------------------------------------------------------------------------------------------|------------------------------------------------------------------------------------------------------------------------------------------------------------------------------------------------------------------------------------------------------------------------------------------------------------------------------------|
|                                |                                                                | Intervention                                                                                    | Comparator                      |                                                                                                                                                                                                            |                                                                                                                                                                                                                                     |                                                                                                                                                                                                                                                                                                                                    |
| Interventional studies         |                                                                |                                                                                                 |                                 |                                                                                                                                                                                                            |                                                                                                                                                                                                                                     |                                                                                                                                                                                                                                                                                                                                    |
| Aiken LS (20) 2006 USA         | Evaluation phase RCT<br><br>Community based and Hospital based | Note: Mixed population study with subset analysis of CHF patients in some outcome measures.     |                                 | PhoenixCare<br>Home-based palliative care focused on disease and symptom management, patient and caregiver education on disease management, and social and psychological support.                          | 1. Self-management of illness and knowledge of resources<br>2. Preparation for end of life<br>3. Physical and mental functioning<br>a. Participation in enjoyable activities<br>b. Symptom control<br>c. Trajectories of mental and | 1. Greater information for self-management, greater appreciation of resources available to help with their illness and initially, better preparedness for daily experiences in the intervention arm. ♦<br>2. PhoenixCare participants showed a higher rate of having a living will or advance directive vs controls. (p < 0.05). ♦ |
|                                |                                                                | N = 100 (patients with CHF = 67)                                                                | N = 90 (patients with CHF = 62) | Providers: Registered nurse case manager (co-ordinator), primary care physician, health-plan case manager, and community agencies supported by a medical director, social worker, and pastoral counsellor. |                                                                                                                                                                                                                                     |                                                                                                                                                                                                                                                                                                                                    |
|                                |                                                                | Mean Age (SD) = 68 (14)                                                                         | Mean Age (SD) = 70 (13)         |                                                                                                                                                                                                            |                                                                                                                                                                                                                                     |                                                                                                                                                                                                                                                                                                                                    |
|                                |                                                                | Sex: M = 42.0; F = 58.0                                                                         | Sex: M = 30.0; F = 70.0         |                                                                                                                                                                                                            |                                                                                                                                                                                                                                     |                                                                                                                                                                                                                                                                                                                                    |

Supplementary table 2: Characteristics of included studies

|                                              |                                                                                           |                                                                                                                                       |                                                                                                                                        |                                                                                                                                                                                                                                                                                                                            |                                                                                     |                                                                                                                                                                                                           |
|----------------------------------------------|-------------------------------------------------------------------------------------------|---------------------------------------------------------------------------------------------------------------------------------------|----------------------------------------------------------------------------------------------------------------------------------------|----------------------------------------------------------------------------------------------------------------------------------------------------------------------------------------------------------------------------------------------------------------------------------------------------------------------------|-------------------------------------------------------------------------------------|-----------------------------------------------------------------------------------------------------------------------------------------------------------------------------------------------------------|
|                                              |                                                                                           | No data on<br>NYHA Class or<br>LVEF                                                                                                   | No data on<br>NYHA Class or<br>LVEF                                                                                                    | <u>Usual Care</u><br>Medical and disease orientated care included medication and technical treatment and other support service.<br><br>Providers: Managed care organisations.                                                                                                                                              | physical functioning<br>4. Utilisation of medical service                           | 3a. NSD in CHF.<br>3b. High symptom distress in PhoenixCare ( $p < 0.05$ ).<br>3c. NSD in mental and physical functioning among CHF control.<br>4. Relatively unchanged over time with NSD across arms.   |
| <b>Bekelman<br/>DB (21)<br/>2015<br/>USA</b> | Evaluation phase RCT with >80% power<br><br>Community based with outpatient consultations | N = 187<br><br>Mean Age (SD) = 68.3 (9.6)<br><br>Sex: M = 95.2; F = 4.8<br><br>NYHA class I = 16 (8.9%)<br>NYHA class II = 77 (42.8%) | N = 197<br><br>Mean Age (SD) = 67.9 (10.6)<br><br>Sex: M = 98.0; F = 2.0<br><br>NYHA class I = 16 (8.5%)<br>NYHA class II = 85 (45.0%) | <u>Patient-Centred Disease Management</u><br>Multidisciplinary collaborative care of HF disease management, screening for and treatment of depression and telemonitoring with patient self-care support.<br><br>Providers: Registered nurse (co-ordinator), primary care physician, psychiatrist.<br><br><u>Usual Care</u> | 1. HF-specific health status<br>2. Depression<br>3. Mortality<br>4. Hospitalisation | 1. NSD in KCCQ overall score.<br>2. Greater improvement in PHQ-9 in the intervention arm ( $p = 0.01$ ).<br>3. Fewer patients died in the intervention arm ( $p = 0.04$ ).<br>4. NSD in hospitalisations. |

Supplementary table 2: Characteristics of included studies

|                                                  |                                                                                          |                                                                                                                                                                                   |                                                                                                                                                                                    |                                                                                                                                                                                                                                                                     |                                                                                                                                                                                                                                                                                                                                                                                                                                                                                      |
|--------------------------------------------------|------------------------------------------------------------------------------------------|-----------------------------------------------------------------------------------------------------------------------------------------------------------------------------------|------------------------------------------------------------------------------------------------------------------------------------------------------------------------------------|---------------------------------------------------------------------------------------------------------------------------------------------------------------------------------------------------------------------------------------------------------------------|--------------------------------------------------------------------------------------------------------------------------------------------------------------------------------------------------------------------------------------------------------------------------------------------------------------------------------------------------------------------------------------------------------------------------------------------------------------------------------------|
|                                                  |                                                                                          | NYHA class III<br>= 82 (45.6%)<br>NYHA class IV<br>= 5 (2.8%)<br><br>LVEF:<br>Normal = 78<br>(45.6%)<br>Mild = 34<br>(19.9%)<br>Moderate = 46<br>(26.9%)<br>Severe = 13<br>(7.6%) | NYHA class III<br>= 82 (43.4%)<br>NYHA class IV<br>= 6 (3.2%)<br><br>LVEF:<br>Normal = 84<br>(47.5%)<br>Mild = 34<br>(19.2%)<br>Moderate = 32<br>(18.1%)<br>Severe = 27<br>(15.3%) | Regular care at the discretion of health care provider. Information sheets for self-care given and if patients screened positive for depression at baseline, primary care physicians were notified.<br><br>Providers: Regular health care professionals and nurses. |                                                                                                                                                                                                                                                                                                                                                                                                                                                                                      |
| <b>Brännström<br/>M (22)<br/>2014<br/>Sweden</b> | Evaluation phase RCT with 80% power<br><br>Community based with outpatient consultations | N = 36<br><br>Mean Age (SD) = 81.9 (7.2)<br><br>Sex: M = 72.2; F = 27.8                                                                                                           | N = 36<br><br>Mean Age (SD) = 76.6 (10.2)<br><br>Sex: M = 69.4; F = 30.6                                                                                                           | <u>Palliative advanced home care and heart failure care (PREFER) model</u><br><br>Person-centred care, total care including assessment of symptoms, quality of life, and risk, and registration into HF and palliative care registry.                               | <div>1. Symptom burden</div> <div>2. Health related quality of life</div> <div>3. Disease-specific quality of life</div> <div>4. Functional classes</div> <div>5. Hospitalisation</div> <div>6. Resource utilisation</div> <div>1. NSD in overall score</div> <div>2. Age-adjusted health related quality of life was better in PREFER group (p = 0.02).</div> <div>3. NSD in overall disease specific quality of life.</div> <div>4. Improved mean NYHA class (p = 0.012) and</div> |

Supplementary table 2: Characteristics of included studies

|                                          |                                                                            |                                                                                                                                                        |                                                                                                                                                        |                                                                                                                                                                                                                                                                                                           |                                                                                                        |                                                                                                                                                                                                                                                                                                                                                                                                  |
|------------------------------------------|----------------------------------------------------------------------------|--------------------------------------------------------------------------------------------------------------------------------------------------------|--------------------------------------------------------------------------------------------------------------------------------------------------------|-----------------------------------------------------------------------------------------------------------------------------------------------------------------------------------------------------------------------------------------------------------------------------------------------------------|--------------------------------------------------------------------------------------------------------|--------------------------------------------------------------------------------------------------------------------------------------------------------------------------------------------------------------------------------------------------------------------------------------------------------------------------------------------------------------------------------------------------|
|                                          |                                                                            | NYHA class III<br>= 28 (77.8%)<br>NYHA class IV<br>= 8 (22.2%)<br><br>LVEF:<br>40-49% = 13<br>(36.1%)<br>30-39% = 16<br>(44.4%)<br><30% = 7<br>(19.4%) | NYHA class III<br>= 23 (63.9%)<br>NYHA class IV<br>= 11 (30.6%)<br><br>LVEF:<br>40-49% = 12<br>(33.3%)<br>30-39% = 21<br>(58.3%)<br><30% = 3<br>(8.3%) | Providers: Specialised nurses,<br>palliative care nurses, cardiologist,<br>palliative care physician,<br>physiotherapist, and occupational<br>therapist.<br><br><u>Usual care</u><br>No information.<br><br>Providers: General practitioners or<br>doctors and/ or the nurse-led heart<br>failure clinic. |                                                                                                        | more experienced<br>improved NYHA class<br>( $p = 0.015$ ) in the<br>PREFER arm.<br>5. Fewer hospitalisations<br>in the PREFER group<br>( $p = 0.009$ ); with fewer<br>days spent in hospital<br>( $p = 0.0011$ ); NSD in<br>mortality<br>6. Utilisation of visits<br>differed significantly<br>between the two arms<br>in favour of the<br>intervention, but<br>precise results are<br>unclear. |
| <b>Hopp FP<br/>(23)<br/>2016<br/>USA</b> | Evaluation<br>phase RCT<br>with approx.<br>80% power<br><br>Hospital based | N = 43<br><br>Mean Age (SD)<br>= 67.0 (11.0)                                                                                                           | N = 42<br><br>Mean Age (SD)<br>= 68.0 (13.0)                                                                                                           | <u>Palliative Care Consultation</u><br>Clinical interviews to assess for<br>uncontrolled symptoms, goals of<br>care, advance care planning, code<br>status, and desired post-treatment<br>residential setting.                                                                                            | 1. Election vs non-<br>election of comfort<br>care<br>a. Outpatient<br>hospice<br>b. Inpatient hospice | 1. NSD in the primary end<br>point.<br>2. NSD in mortality.                                                                                                                                                                                                                                                                                                                                      |

Supplementary table 2: Characteristics of included studies

|                               |                                      |                                                                             |                                                                             |                                                                                                                                                                                                                                                                                                              |                                                                                                                                                                  |                                                                                                                                                                                                                                                                                                                       |
|-------------------------------|--------------------------------------|-----------------------------------------------------------------------------|-----------------------------------------------------------------------------|--------------------------------------------------------------------------------------------------------------------------------------------------------------------------------------------------------------------------------------------------------------------------------------------------------------|------------------------------------------------------------------------------------------------------------------------------------------------------------------|-----------------------------------------------------------------------------------------------------------------------------------------------------------------------------------------------------------------------------------------------------------------------------------------------------------------------|
|                               |                                      | Sex: M = 60.5;<br>F = 39.5                                                  | Sex: M = 42.9;<br>F = 57.1                                                  | Providers: Physician and advanced nurse practitioner. Other professionals participated as needed – chaplains and social workers.                                                                                                                                                                             | c. A "Do Not Resuscitate" order during hospitalisation                                                                                                           |                                                                                                                                                                                                                                                                                                                       |
|                               |                                      | No data on NYHA Class                                                       | No data on NYHA Class                                                       |                                                                                                                                                                                                                                                                                                              | d. A "Do Not Resuscitate" order at home or nursing home                                                                                                          |                                                                                                                                                                                                                                                                                                                       |
|                               |                                      | Mean LVEF = 36.4% (16.7)                                                    | Mean LVEF = 38.1% (16.8)                                                    | Usual Care<br>No information.                                                                                                                                                                                                                                                                                |                                                                                                                                                                  |                                                                                                                                                                                                                                                                                                                       |
| Rogers JG<br>(24) 2017<br>USA | Evaluation phase RCT with <80% power | N = 75<br><br>Mean Age (SD) = 71.9 (12.4)<br><br>Sex: M = 56.0;<br>F = 44.0 | N = 75<br><br>Mean Age (SD) = 69.8 (13.4)<br><br>Sex: M = 49.3;<br>F = 50.7 | <u>Palliative Care in Heart Failure (PAL-HF)</u><br>Interdisciplinary, guideline-driven, multicomponent palliative care intervention in combination with contemporary HF management, including assessment and management of physical symptoms, psychosocial and spiritual concerns and advance care planning | 1. HF-specific quality of life<br>2. General and palliative care specific, health related quality of life<br>3. Spiritual wellbeing<br>4. Depression and anxiety | 1. Greater improvements in the HF-specific quality of life (p = 0.03) in PAL-HF arm<br>2. Greater improvement in health related quality of life in the intervention arm (p = 0.035).<br>3. Spiritual wellbeing was better improved in the intervention arm (p = 0.027)<br>4. Depressive symptoms improved more in the |
|                               | Community based and                  | NYHA class III = 54 (72.0%)                                                 | NYHA class III = 58 (77.3%)                                                 |                                                                                                                                                                                                                                                                                                              |                                                                                                                                                                  |                                                                                                                                                                                                                                                                                                                       |
|                               | Hospital based                       | NYHA class IV = 15 (20.0%)                                                  | NYHA class IV = 5 (6.7%)                                                    |                                                                                                                                                                                                                                                                                                              |                                                                                                                                                                  |                                                                                                                                                                                                                                                                                                                       |
|                               |                                      | LVEF:                                                                       | LVEF:                                                                       |                                                                                                                                                                                                                                                                                                              |                                                                                                                                                                  |                                                                                                                                                                                                                                                                                                                       |



Supplementary table 2: Characteristics of included studies

|                                               |                                     |                                                                                                 |                                                                                                 |                                                                                                                                                                                                                                                                                                                                                                                                                                                                                                                                |                                                               |                                                                                                                          |
|-----------------------------------------------|-------------------------------------|-------------------------------------------------------------------------------------------------|-------------------------------------------------------------------------------------------------|--------------------------------------------------------------------------------------------------------------------------------------------------------------------------------------------------------------------------------------------------------------------------------------------------------------------------------------------------------------------------------------------------------------------------------------------------------------------------------------------------------------------------------|---------------------------------------------------------------|--------------------------------------------------------------------------------------------------------------------------|
|                                               |                                     | >55% = 21<br>(28.0%)<br>40-55% = 14<br>(18.7%)<br>25-40% = 17<br>(22.7%)<br><25 = 23<br>(30.7%) | >55% = 14<br>(18.7%)<br>40-55% = 19<br>(25.3%)<br>25-40% = 14<br>(18.7%)<br><25 = 28<br>(37.3%) | <p>Providers: Palliative care nurse practitioner, palliative medicine board-certified physician, clinical cardiology team, and when required, mental health provider.</p> <p><u>Usual care</u></p> <p>Inpatient care focused on symptom relief with outpatient follow up. They were not denied access to inpatient palliative care consultation.</p> <p>Providers: Cardiologist directed team with HF expertise in inpatient setting. General practitioners , HF cardiologists, nurse practitioners in outpatient setting.</p> |                                                               | intervention arm (p = 0.02), as well as anxiety (p = 0.048).                                                             |
| <b>Sahlen KG<br/>(25)<br/>2015<br/>Sweden</b> | Evaluation phase RCT with 80% power | N = 36<br><br>Mean Age (SD) = 81.9 (7.2)                                                        | N = 36<br><br>Mean Age (SD) = 76.6 (10.2)                                                       | <p>Note: Same study as Brännström <i>et al.</i> (3)</p> <p><u>PREFER model</u></p>                                                                                                                                                                                                                                                                                                                                                                                                                                             | <p>1. Quality adjusted life years</p> <p>2. Costs of care</p> | <p>1. Small but significant difference in the weight of the quality adjusted life year (p = 0.026) favouring PREFER.</p> |

Supplementary table 2: Characteristics of included studies

|                                      |                                               |                                                              |                                                              |                                                                                                                                                                                                                                                                                                                                                                                                                                                    |                                                                                               |                                                                                                |
|--------------------------------------|-----------------------------------------------|--------------------------------------------------------------|--------------------------------------------------------------|----------------------------------------------------------------------------------------------------------------------------------------------------------------------------------------------------------------------------------------------------------------------------------------------------------------------------------------------------------------------------------------------------------------------------------------------------|-----------------------------------------------------------------------------------------------|------------------------------------------------------------------------------------------------|
|                                      | Community based with outpatient consultations | Sex: M = 72.2; F = 27.8<br><br>No data on NYHA Class or LVEF | Sex: M = 69.4; F = 30.6<br><br>No data on NYHA Class or LVEF | Person-centred care, total care including assessment of symptoms, quality of life, and risk, and registration into HF and palliative care registry.<br><br>Providers: Specialised nurses, palliative care nurses, cardiologist, palliative care physician, physiotherapist, and occupational therapist.<br><br><u>Usual care</u><br>No information.<br><br>Providers: General practitioners or doctors and/ or the nurse-led heart failure clinic. |                                                                                               | 2. NSD in cost of care between the two arms.                                                   |
| Sidebottom<br>AC (26)<br>2015<br>USA | Evaluation phase RCT, but poor recruitment    | N = 116<br><br>Mean Age (SD) = 76.0 (11.9)                   | N = 116<br><br>Mean Age (SD) = 70.9 (13.6)                   | <u>Palliative care</u><br>Assessment of symptom burden, emotional, spiritual and psychosocial care, coordination of care orders, recommendation for                                                                                                                                                                                                                                                                                                | 1. Symptom burden<br>2. Depression<br>3. Quality of life<br>4. Readmissions<br>5. Hospice use | 1. Difference in symptom burden favours intervention in mean change from baseline (p < 0.001). |

Supplementary table 2: Characteristics of included studies

|                                 |                                             |                                                                             |                                                                             |                                                                                                                                                                                                                                                                       |                                                                                                                                      |                                                                                                                                                                                                                                                                                                      |
|---------------------------------|---------------------------------------------|-----------------------------------------------------------------------------|-----------------------------------------------------------------------------|-----------------------------------------------------------------------------------------------------------------------------------------------------------------------------------------------------------------------------------------------------------------------|--------------------------------------------------------------------------------------------------------------------------------------|------------------------------------------------------------------------------------------------------------------------------------------------------------------------------------------------------------------------------------------------------------------------------------------------------|
|                                 | resulted in 47.5% power                     | Sex: M = 47.4;<br>F = 52.6                                                  | Sex: M = 57.8;<br>F = 42.2                                                  | change in current or future treatments.                                                                                                                                                                                                                               | 6. ACP<br>7. Mortality                                                                                                               | 2. Difference in depression favours intervention (p < 0.001).<br>3. Improvement of quality of life is better in the intervention arm (p < 0.001).<br>4. NSD in readmissions<br>5. NSD in hospice use between arms.<br>6. ACP process 2.87 times more likely in intervention.<br>7. NSD in mortality. |
|                                 | 1 Inpatient consultation                    | No data on NYHA Class or LVEF                                               | No data on NYHA Class or LVEF                                               | Providers: 4 physicians board certified in hospice and palliative medicine, 2 clinical nurse specialists board certified in advanced practice palliative care nursing, a social worker and a chaplain.<br><br><u>Control group</u><br>No information.                 |                                                                                                                                      |                                                                                                                                                                                                                                                                                                      |
| <b>Wong FKY (27) 2016 China</b> | Evaluation phase RCT<br><br>Community based | N = 43<br><br>Mean Age (SD) = 78.3 (16.8)<br><br>Sex: M = 43.9;<br>F = 56.1 | N = 41<br><br>Mean Age (SD) = 78.4 (10.0)<br><br>Sex: M = 61.0;<br>F = 39.0 | <u>Transitional Care Palliative End-Stage Heart Failure</u><br>Pre-discharge assessment, patients' needs assessment (environmental, psychosocial, physiological and health-related behaviour) and intervention, goal setting and creating a mutually agree care plan. | 1. Readmissions at 4 and 12 weeks<br>2. Symptom intensity<br>3. Functional status<br>4. Quality of life<br>5. Satisfaction with care | 1. NSD in 4 week re-admission rate, however there was significantly fewer 12 week re-admissions in the intervention arm (p = 0.001).                                                                                                                                                                 |

Supplementary table 2: Characteristics of included studies

|                                    |                                                                          |                                                                                                                                   |                                                                                                                                    |                                                                                                                                                                                                                                                                                                                                                      |                                                                                                                         |                                                                                                                                                                                                                                                                                                                                                                                                                                                                                    |
|------------------------------------|--------------------------------------------------------------------------|-----------------------------------------------------------------------------------------------------------------------------------|------------------------------------------------------------------------------------------------------------------------------------|------------------------------------------------------------------------------------------------------------------------------------------------------------------------------------------------------------------------------------------------------------------------------------------------------------------------------------------------------|-------------------------------------------------------------------------------------------------------------------------|------------------------------------------------------------------------------------------------------------------------------------------------------------------------------------------------------------------------------------------------------------------------------------------------------------------------------------------------------------------------------------------------------------------------------------------------------------------------------------|
|                                    |                                                                          | NYHA class II<br>= 6 (14.0%)<br>NYHA class III<br>= 31 (72.0%)<br>NYHA class IV<br>= 6 (14.0%)<br><br>Mean LVEF =<br>39.0% (14.0) | NYHA class II<br>= 3 (7.3%)<br>NYHA class III<br>= 22 (53.7%)<br>NYHA class IV<br>= 16 (39.0 %)<br><br>Mean LVEF =<br>37.0% (17.0) | Providers: Nurse case managers<br>(primary provider), trained<br>volunteers, and nursing students.<br><br><u>Control group</u><br>Usual care – palliative care medical<br>clinic, discharge advice on<br>symptom management and<br>medication, and referrals if<br>appropriate. Also, control group<br>received 2 attention control social<br>calls. |                                                                                                                         | <ol style="list-style-type: none"><li>2. NSD in symptom<br/>burden across groups.</li><li>3. NSD in functional<br/>status between or<br/>within groups.</li><li>4. Both heart failure<br/>specific (p = 0.01) and<br/>palliative care specific<br/>(p = 0.05) quality of<br/>life tools found<br/>significant<br/>improvement in the<br/>intervention arm.</li><li>5. The intervention group<br/>had significantly (p &lt;<br/>0.001) higher<br/>satisfaction with care.</li></ol> |
| <b>Paes P (28)<br/>2005<br/>UK</b> | Feasibility and<br>pilot phase<br>RCT<br><br>Outpatient<br>consultations | N = 6<br><br>Mean Age (SD)<br>= 73.2 (4.2)                                                                                        | N = 7<br><br>Mean Age (SD)<br>= 78.0 (7.0)                                                                                         | <u>Palliative care consultation</u><br>1 hour of palliative care medical<br>outpatient consultation, followed<br>by monthly 30-minute consultation<br>for a total of 5 months.                                                                                                                                                                       | <ol style="list-style-type: none"><li>1. Depression</li><li>2. Quality of life</li><li>3. Clinical evaluation</li></ol> | <ol style="list-style-type: none"><li>1. NSD in depression<br/>between treatment<br/>arms.</li><li>2. NSD in quality of life<br/>between treatment<br/>arms.</li></ol>                                                                                                                                                                                                                                                                                                             |

Supplementary table 2: Characteristics of included studies

|                                  |                                                          |                                                                                                  |                                                                                                   |                                                                                                                                                                                                                                                                                                                                                                                                    |                                                                                                                                                                                                              |                                                                                                                                                                                               |
|----------------------------------|----------------------------------------------------------|--------------------------------------------------------------------------------------------------|---------------------------------------------------------------------------------------------------|----------------------------------------------------------------------------------------------------------------------------------------------------------------------------------------------------------------------------------------------------------------------------------------------------------------------------------------------------------------------------------------------------|--------------------------------------------------------------------------------------------------------------------------------------------------------------------------------------------------------------|-----------------------------------------------------------------------------------------------------------------------------------------------------------------------------------------------|
|                                  |                                                          | Sex: M = 100.0; F = 0.0                                                                          | Sex: M = 80.0; F = 20.0                                                                           | Provider: Palliative care physician.                                                                                                                                                                                                                                                                                                                                                               |                                                                                                                                                                                                              | 3. The evaluation forms were positive and found the format acceptable.                                                                                                                        |
|                                  |                                                          | NYHA class III = 3 (50.0%)                                                                       | NYHA class III = 3 (60.0%)                                                                        | <u>Control group</u>                                                                                                                                                                                                                                                                                                                                                                               |                                                                                                                                                                                                              |                                                                                                                                                                                               |
|                                  |                                                          | NYHA class IV = 3 (50%)                                                                          | NYHA class IV = 2 (40%)                                                                           | Regular cardiology care.                                                                                                                                                                                                                                                                                                                                                                           |                                                                                                                                                                                                              |                                                                                                                                                                                               |
|                                  |                                                          | No data on LVEF                                                                                  | No data on LVEF                                                                                   |                                                                                                                                                                                                                                                                                                                                                                                                    |                                                                                                                                                                                                              |                                                                                                                                                                                               |
| <b>O'Donnell A (30) 2018 USA</b> | Pilot study RCT<br>In-patient or community consultations | N = 26<br>Mean Age (SD) = 74.7 (11.2)<br>Sex: M 53.9, F = 46.1<br>NYHA class 1 or 2 = 10 (38.5%) | N = 24<br>Mean Age (SD) = 69.2 (10.2)<br>Sex: M = 62.5, F = 37.5<br>NYHA class 1 or 2 = 8 (33.3%) | <u>Social Work (palliative care trained) consultation</u><br><u>Conversation about goals of care and advanced care planning started in hospital and continued in the community post-discharge.</u><br><u>Palliative physician assessment and management plan including outpatient palliative medicine consults as needed</u><br><u>Provider: Palliative social worker and palliative physician</u> | 1. % patients with ACP documentation and % aligned preferences at 6 months<br>2. FACIT-Sp<br>3. Patient and provider preferences of care questionnaire<br>4. KCCQ-12<br>5. EQ-5D VAS<br>6. PHQ-8<br>7. GAD-7 | 1. Higher % with ACP documentation in intervention arm (p = 0.02), and better alignment with physician assessed prognosis in intervention arm (p <0.001)<br>NSD in any other outcome measure. |

Supplementary table 2: Characteristics of included studies

|                                            |                                               |                                                                                                                                                                               |                                                                                                                                                                                                   |                                                                                                                                                                                                                                                                                                                                                                                                                                                                                                                                                      |                                                                                                                                                                                                                                                                                            |                                                                                                                                                                                                                                                                                                                                            |
|--------------------------------------------|-----------------------------------------------|-------------------------------------------------------------------------------------------------------------------------------------------------------------------------------|---------------------------------------------------------------------------------------------------------------------------------------------------------------------------------------------------|------------------------------------------------------------------------------------------------------------------------------------------------------------------------------------------------------------------------------------------------------------------------------------------------------------------------------------------------------------------------------------------------------------------------------------------------------------------------------------------------------------------------------------------------------|--------------------------------------------------------------------------------------------------------------------------------------------------------------------------------------------------------------------------------------------------------------------------------------------|--------------------------------------------------------------------------------------------------------------------------------------------------------------------------------------------------------------------------------------------------------------------------------------------------------------------------------------------|
|                                            |                                               | NYHA class 3<br>or 4 = 16<br>(61.5%)<br><br>Mean LVEF =<br>30% (14)                                                                                                           | NYHA class 3<br>or 4 = 16<br>(66.7%)<br><br>Mean LVEF =<br>36% (17)                                                                                                                               | <u>Control: Usual care, includes<br/>available information about<br/>palliative care and advance care<br/>planning, and access to in-patient<br/>palliative care team if needed. NB.<br/>Out patient palliative care consults<br/>NOT part of usual care.</u>                                                                                                                                                                                                                                                                                        |                                                                                                                                                                                                                                                                                            |                                                                                                                                                                                                                                                                                                                                            |
| <b>Johnson<br/>MJ (31)<br/>2018<br/>UK</b> | Out-patient or<br>home-based<br>interventions | Cohort 1:<br><br>palliative<br>cardiology<br><br>N = 43<br><br>Mean Age (SD)<br>= 75.8 (12.3)<br><br>Sex: M 55.8, F<br>= 44.2<br><br>NYHA: class I<br>= 0<br><br>class II = 0 | Cohort 2: usual<br>care<br><br>N = 34<br><br>Mean Age (SD)<br>= 78.4 (11.3)<br><br>Sex: M 50.0, F<br>= 50.0<br><br>NYHA: class I<br>= 0<br><br>class II = 3 (8.8)<br><br>class III = 30<br>(88.2) | <u>Cohort 1. Palliative cardiology<br/>clinic consultations with a<br/>cardiologist and heart failure nurse<br/>consultant with a special interest in<br/>palliative care. Full holistic<br/>assessment, medication review,<br/>advance care planning, symptom<br/>management, care co-ordination,<br/>and community based follow up<br/>with liaison with primary care.<br/>Referrals to other services<br/>including specialist palliative care<br/>as needed</u><br><br><u>Cohort 2. Usual care. Case-based<br/>care from heart failure nurse</u> | 1. Feasibility measures<br>(recruitment,<br>attrition, data<br>quality, sample size<br>calculation for trial)<br><br>2. AKPS<br>3. ESAS<br>4. KCCQ-12<br>5. HADs<br>6. EQ-5L-5D<br>7. Health service<br>utilisation<br>8. Patient<br>understanding<br>9. ACP documentation<br>10. Survival | Groups imbalanced; Cohort<br>1 less well, more<br>symptomatic and worse<br>QoL<br><br>1. Concluded a future trial<br>was feasibility and<br>sample size for KCCQ-<br>12 as primary outcome<br>calculated<br><br>2. NSD AKPS<br>3. Greater improvement in<br>usual care (p = 0.046)<br><br>4. NSD KCCQ-12<br>5. NSD HADs<br>6. NSD EQ-5D-5L |

Supplementary table 2: Characteristics of included studies

|                                            |                                                                                                          |                                                                                                                                                                                                                                                |                       |                                                                                                                                                                                                                                                                                                                                             |                                                                                                                                                                                  |                                                                                                                                                                                                                                                                    |
|--------------------------------------------|----------------------------------------------------------------------------------------------------------|------------------------------------------------------------------------------------------------------------------------------------------------------------------------------------------------------------------------------------------------|-----------------------|---------------------------------------------------------------------------------------------------------------------------------------------------------------------------------------------------------------------------------------------------------------------------------------------------------------------------------------------|----------------------------------------------------------------------------------------------------------------------------------------------------------------------------------|--------------------------------------------------------------------------------------------------------------------------------------------------------------------------------------------------------------------------------------------------------------------|
|                                            |                                                                                                          | class III = 40<br>(93.0)<br><br>class IV = 3<br>(7.0)                                                                                                                                                                                          | class IV = 1<br>(2.9) | <u>specialist in community care, with access to hospital-based cardiology physicians as needed. Specialist palliative care available if referred.</u>                                                                                                                                                                                       |                                                                                                                                                                                  | <p>7. Fewer nights in hospital but more GP visits in cohort 1. Average costs reduced by £785 per patient.</p> <p>8. Better patient understanding in Cohort 1 (p&lt;0.001)</p> <p>9. More ACP documentation in Cohort 1 (p&lt;0.001)</p> <p>10. NSD in survival</p> |
| <b>Bakitas M<br/>(29)<br/>2017<br/>USA</b> | <p>Single-arm feasibility and pilot phase trial</p> <p>Community based with outpatient consultations</p> | <p>N = 61</p> <p>Mean Age (SD) = 70.59 (10.7)</p> <p>Sex: M = 50.8; F = 49.2</p> <p>NYHA class I = 1 (1.6%)</p> <p>NYHA class II = 3 (4.9%)</p> <p>NYHA class III = 43 (70.5%)</p> <p>NYHA class IV = 12 (19.7%)</p> <p>Unknown = 2 (3.3%)</p> |                       | <p><u>Educate, Nurture, Advise, Before Life Ends Comprehensive Heartcare for Patients and Caregivers (ENABLE CHF-PC)</u></p> <p>A telephonic early palliative care intervention for rural-dwelling, underserved HF patient and caregivers including in-person palliative care consultation, weekly semi-structured telephone palliative</p> | <p>1. Feasibility and acceptability</p> <p>2. Patient reported outcomes</p> <p>a. Disease specific quality of life</p> <p>b. Symptom burden</p> <p>c. Anxiety and depression</p> | <p>1. Results discussed in paper – not relevant to the review.</p> <p>2. Patient reported outcomes</p> <p>a. Significant improvement in KCCQ clinical summary (p = 0.009)</p>                                                                                      |

Supplementary table 2: Characteristics of included studies

|  |  |                           |                                                                                      |                                                                                                                                                                                                                                                                                                                                 |                                                                                                                                                                                                                                                                                                                                                                       |
|--|--|---------------------------|--------------------------------------------------------------------------------------|---------------------------------------------------------------------------------------------------------------------------------------------------------------------------------------------------------------------------------------------------------------------------------------------------------------------------------|-----------------------------------------------------------------------------------------------------------------------------------------------------------------------------------------------------------------------------------------------------------------------------------------------------------------------------------------------------------------------|
|  |  | Mean LVEF = 37.86% (16.3) | care nurse coaching, and monthly follow-ups.<br><br>Providers: Trained nurse coaches | d. General wellbeing<br>e. Assessment of chronic illness care<br>3. Caregiver reported outcomes<br>a. Caregiving outcomes measuring life changes<br>b. Anxiety and depression<br>c. General wellbeing<br>d. Caregiver burden<br>e. Positive aspects of caregiving<br>4. Resource use<br>a. Number of days in hospital per month | b. Significant reduction in symptom burden (p = 0.0004)<br>c. NSD in anxiety or depression<br>d. NSD in physical health, however there was significant improvement in the global mental health T score of PROMIS (p = 0.04)<br>e. NSD in PACIC summary score.<br>3. Caregiver reported outcomes<br>a. NSD in caregiving outcomes.<br>b. NSD in anxiety or depression. |
|--|--|---------------------------|--------------------------------------------------------------------------------------|---------------------------------------------------------------------------------------------------------------------------------------------------------------------------------------------------------------------------------------------------------------------------------------------------------------------------------|-----------------------------------------------------------------------------------------------------------------------------------------------------------------------------------------------------------------------------------------------------------------------------------------------------------------------------------------------------------------------|



Supplementary table 2: Characteristics of included studies

|  |  |  |  |                                                                                                                                 |                                                                                                                                                                                                                                                                                                                                                                                                                                                         |
|--|--|--|--|---------------------------------------------------------------------------------------------------------------------------------|---------------------------------------------------------------------------------------------------------------------------------------------------------------------------------------------------------------------------------------------------------------------------------------------------------------------------------------------------------------------------------------------------------------------------------------------------------|
|  |  |  |  | <div><div>b. Number of days in ICU per month</div><div>c. Number of visits to ED per month</div><div>d. Hospice use</div></div> | <div><div>c. NSD in the carer's general wellbeing.</div><div>d. Significant reduction in burden on the carer (p = 0.002)</div><div>e. NSD in the positive aspects of caregiving.</div><div>4. Resource use</div><div>a. Significant reduction in number of days in hospital per month (p = 0.002)</div><div>b. NSD in number of days in ICU per month</div><div>c. NSD in number of visits to ED per month</div><div>d. NSD in hospice use.</div></div> |
|--|--|--|--|---------------------------------------------------------------------------------------------------------------------------------|---------------------------------------------------------------------------------------------------------------------------------------------------------------------------------------------------------------------------------------------------------------------------------------------------------------------------------------------------------------------------------------------------------------------------------------------------------|

Supplementary table 2: Characteristics of included studies

|                                              |                                                         |                                                                                                                       |                                                                                                                      |                                                                                                                                                                                                                                                                                                                                                   |                                                                                                |                                                                                                                                                                                                                                                                                                                               |
|----------------------------------------------|---------------------------------------------------------|-----------------------------------------------------------------------------------------------------------------------|----------------------------------------------------------------------------------------------------------------------|---------------------------------------------------------------------------------------------------------------------------------------------------------------------------------------------------------------------------------------------------------------------------------------------------------------------------------------------------|------------------------------------------------------------------------------------------------|-------------------------------------------------------------------------------------------------------------------------------------------------------------------------------------------------------------------------------------------------------------------------------------------------------------------------------|
| <b>Tadwalkar<br/>R (32)<br/>2014<br/>USA</b> | Quasi-<br>experimental<br>trial<br><br>Inpatient visits | N = 14<br><br>Mean Age (SD)<br>= 58 (11)<br><br>Sex: M = 42.9;<br>F = 57.1<br><br>No data on<br>NYHA Class or<br>LVEF | N = 9<br><br>Mean Age (SD)<br>= 57 (10)<br><br>Sex: M = 55.6;<br>F = 44.4<br><br>No data on<br>NYHA Class or<br>LVEF | <u>Religious support</u><br>Prayer, reading of religious text,<br>religion-specific rituals, and other<br>pastoral care.<br><br>Provider: member of the<br>chaplaincy.<br><br><u>Non-religious support</u><br>Personal discussions, recreational<br>activities, undertaking social and<br>spiritual support.<br><br>Provider: in-house volunteer. | 1. Depression<br>2. Spirituality<br>3. Symptom burden<br>4. Enjoyment and life<br>satisfaction | 1. Significant reduction in<br>depression over time<br>but there was NSD<br>between the two<br>groups.<br>2. NSD in spirituality<br>between the two groups<br>or over time.<br>3. NSD in symptom<br>burden between groups<br>or over time.<br>4. NSD in enjoyment and<br>life satisfaction<br>between groups or over<br>time. |
| <b>Observational studies</b>                 |                                                         |                                                                                                                       |                                                                                                                      |                                                                                                                                                                                                                                                                                                                                                   |                                                                                                |                                                                                                                                                                                                                                                                                                                               |
| <b>Connor SR<br/>(33)<br/>2007<br/>USA</b>   | Retrospective<br>Cohort Study<br><br>Hospice care       | N = 2095<br>(patients with<br>CHF = 83)<br><br>Mean Age =<br>73.5                                                     | N = 2260<br>(patients with<br>CHF = 457)<br><br>Mean Age =<br>73.9                                                   | <u>Intervention</u><br>Hospice care<br><br><u>Comparator</u><br>No claims for hospice care                                                                                                                                                                                                                                                        | 1. Survival                                                                                    | 1. Increase in survival<br>period in those who<br>received hospice care<br>(p = 0.0540).                                                                                                                                                                                                                                      |

Supplementary table 2: Characteristics of included studies

|                                                |                                               |                                                                                                      |                                                                                                      |                                                                                                                                                                                                                                                                                                                                                                                                                          |                                                                                                        |                                                                                                                                                                                                                                                                                                                                                                                |
|------------------------------------------------|-----------------------------------------------|------------------------------------------------------------------------------------------------------|------------------------------------------------------------------------------------------------------|--------------------------------------------------------------------------------------------------------------------------------------------------------------------------------------------------------------------------------------------------------------------------------------------------------------------------------------------------------------------------------------------------------------------------|--------------------------------------------------------------------------------------------------------|--------------------------------------------------------------------------------------------------------------------------------------------------------------------------------------------------------------------------------------------------------------------------------------------------------------------------------------------------------------------------------|
|                                                |                                               | Sex: M = 55; F = 45                                                                                  | Sex: M = 59; F = 41                                                                                  |                                                                                                                                                                                                                                                                                                                                                                                                                          |                                                                                                        |                                                                                                                                                                                                                                                                                                                                                                                |
|                                                |                                               | No data on NYHA Class or LVEF                                                                        | No data on NYHA Class or LVEF                                                                        |                                                                                                                                                                                                                                                                                                                                                                                                                          |                                                                                                        |                                                                                                                                                                                                                                                                                                                                                                                |
| <b>Enguidanos<br/>SM (34)<br/>2005<br/>USA</b> | Prospective Cohort Study                      | Note: Mixed population study with subset analysis of CHF patients                                    |                                                                                                      | <u>Kaiser Permanente Home-based Palliative Care Program</u><br>Extensive patient and family education on the disease/ condition; training in symptom control; psychosocial support aimed at assisting in making care choices in advance.<br><br>Providers: Physicians, nurses, social workers, and other health care professionals.<br><br><u>Usual Care</u><br>Standard Kaiser Permanente TriCentral Service Area care. | 1. Severity of illness<br>2. Service use<br>3. Site of death<br>4. Days on service<br>5. Costs of care | 1. Intervention group had significantly ( $p < 0.001$ ) more severe illness at enrolment. $\diamond$<br>2. NSD in obtaining hospice care between groups. $\diamond$<br>3. Palliative care arm were significantly more likely to die at home ( $p < 0.001$ ).<br>4. Significantly fewer days on service ( $p < 0.001$ ) in the intervention arm.<br>5. Palliative care group on |
|                                                | Community based with outpatient consultations | N = 159<br>(patients with CHF = 31)<br><br>Mean Age (SD) = 70 (13.92)<br><br>Sex: M = 49.1; F = 50.9 | N = 139<br>(patients with CHF = 51)<br><br>Mean Age (SD) = 73 (13.29)<br><br>Sex: M = 44.6; F = 55.4 |                                                                                                                                                                                                                                                                                                                                                                                                                          |                                                                                                        |                                                                                                                                                                                                                                                                                                                                                                                |

Supplementary table 2: Characteristics of included studies

|                                              |                                                       |                                                                                                                    |                                                                                                                     |                                                                                                                                                                                                                                                                                                                                                                                                                                                                                                                               |                                                                                                                                                                 |                                                                                                                                                                                                                                                                                                                                           |
|----------------------------------------------|-------------------------------------------------------|--------------------------------------------------------------------------------------------------------------------|---------------------------------------------------------------------------------------------------------------------|-------------------------------------------------------------------------------------------------------------------------------------------------------------------------------------------------------------------------------------------------------------------------------------------------------------------------------------------------------------------------------------------------------------------------------------------------------------------------------------------------------------------------------|-----------------------------------------------------------------------------------------------------------------------------------------------------------------|-------------------------------------------------------------------------------------------------------------------------------------------------------------------------------------------------------------------------------------------------------------------------------------------------------------------------------------------|
|                                              |                                                       | No data on<br>NYHA Class or<br>LVEF                                                                                | No data on<br>NYHA Class or<br>LVEF                                                                                 | Standard health care in response to<br>needs and home care only when<br>Medicare certified criteria are<br>fulfilled. Access to psychosocial<br>support and social services is very<br>limited.                                                                                                                                                                                                                                                                                                                               |                                                                                                                                                                 | average cost less than<br>those in the control<br>group.                                                                                                                                                                                                                                                                                  |
| <b>Pattenden<br/>JF (35)<br/>2013<br/>UK</b> | Prospective<br>Cohort Study<br><br>Community<br>based | N = 99<br><br>Mean Age (SD)<br>= 81.7<br><br>Sex: M = 60.6;<br>F = 39.4<br><br>No data on<br>NYHA Class or<br>LVEF | N = 98<br><br>Mean Age (SD)<br>= 78.85<br><br>Sex: M = 62.0;<br>F = 37.8<br><br>No data on<br>NYHA Class or<br>LVEF | <u>Better Together Intervention</u><br>Self-management education and<br>advice to patients and their carers,<br>clinical assessment and regular<br>monitoring and review, palliative<br>nursing e.g. medication for<br>symptoms and psychological<br>support, respite care.<br><br>Providers: British Heart Failure<br>(BHF) Heart Failure Specialist<br>Nurses (HFSN); Marie Curie<br>Cancer Care Nurses (MCN), Marie<br>Curie Cancer Care Healthcare<br>Assistants (MCHCAs); district<br>nurses and other support services. | 1. Resource use –<br>admissions, length<br>of stay<br>2. Costs of care<br>3. Benefits of care –<br>death in preferred<br>place of care<br>4. Cost-effectiveness | 1. Smaller proportion of<br>patients in the<br>intervention group in<br>Bradford was admitted<br>to hospital ( $p < 0.01$ ),<br>and fewer admissions<br>per patient in the<br>intervention arm in<br>Poole ( $p < 0.05$ ). NSD<br>in LOS.<br>2. Fewer costs of care in<br>the intervention in both<br>sites (significant in<br>Bradford). |

Supplementary table 2: Characteristics of included studies

|                                                  |                                                                                              |                                                                                                                                                                                       |                                                                                                                                                                                      |                                                                                                                                                                                                                                                                                                                                                                                                                                                                  |                                                                      |                                                                                                                                                                                    |
|--------------------------------------------------|----------------------------------------------------------------------------------------------|---------------------------------------------------------------------------------------------------------------------------------------------------------------------------------------|--------------------------------------------------------------------------------------------------------------------------------------------------------------------------------------|------------------------------------------------------------------------------------------------------------------------------------------------------------------------------------------------------------------------------------------------------------------------------------------------------------------------------------------------------------------------------------------------------------------------------------------------------------------|----------------------------------------------------------------------|------------------------------------------------------------------------------------------------------------------------------------------------------------------------------------|
|                                                  |                                                                                              |                                                                                                                                                                                       |                                                                                                                                                                                      | <u>Control patients</u><br>'Convenience sample' historical sample.                                                                                                                                                                                                                                                                                                                                                                                               |                                                                      | 3. Significantly different distribution of place of death ( $p < 0.0001$ ).<br>4. Uncertainty around incremental cost-effectiveness.                                               |
| <b>Evangelista<br/>LS† (36)<br/>2014<br/>USA</b> | Prospective<br>Single-arm<br>Cohort Study<br><br><br><br><br><br>Outpatient<br>consultations | N = 29<br><br>Mean Age (SD)<br>= 53.3 (7.3)<br><br>Sex: M = 75.9;<br>F = 24.1<br><br>NYHA class II<br>= 20 (69.0%)<br>NYHA class III<br>= 9 (31.0%)<br><br>Mean LVEF =<br>23.1% (4.3) | N = 13<br><br>Mean Age (SD)<br>= 52.5 (7.6)<br><br>Sex: M = 61.5;<br>F = 38.5<br><br>NYHA class II<br>= 9 (69.2%)<br>NYHA class III<br>= 4 (30.8%)<br><br>Mean LVEF =<br>30.5% (9.7) | <u>Palliative Care</u><br>Intake summary with current health status and treatment regimen, assessment of physical and psychological symptoms, determine illness understanding, establish goals of care, assist with treatment decision making and coordination of care.<br><br>Providers: Palliative care specialist (e.g. physician or advance practice nurse).<br><br><u>'Intervention group'</u><br>Participants receiving > 2 palliative care consultations. | 1. Perceived control<br>2. Patient activation<br>3. Symptom distress | 1. Greater improvement in perceived control ( $p < 0.001$ ).<br>2. Greater improvement in activation ( $p < 0.001$ ).<br>3. Greater reduction in symptom distress ( $p < 0.001$ ). |

Supplementary table 2: Characteristics of included studies

|                                                  |                                                                                              |                                                                                                                                                                                       |                                                                                                                                                                                     |                                                                                                                                                                                                                                                                                                                                                                                                                                                                                                          |                                                                                |                                                                                                                                                                                                                                                                                                                                                                               |
|--------------------------------------------------|----------------------------------------------------------------------------------------------|---------------------------------------------------------------------------------------------------------------------------------------------------------------------------------------|-------------------------------------------------------------------------------------------------------------------------------------------------------------------------------------|----------------------------------------------------------------------------------------------------------------------------------------------------------------------------------------------------------------------------------------------------------------------------------------------------------------------------------------------------------------------------------------------------------------------------------------------------------------------------------------------------------|--------------------------------------------------------------------------------|-------------------------------------------------------------------------------------------------------------------------------------------------------------------------------------------------------------------------------------------------------------------------------------------------------------------------------------------------------------------------------|
|                                                  |                                                                                              |                                                                                                                                                                                       |                                                                                                                                                                                     | <u>'Comparator group'</u><br>Participants receiving ≤ 1 palliative care consultations.                                                                                                                                                                                                                                                                                                                                                                                                                   |                                                                                |                                                                                                                                                                                                                                                                                                                                                                               |
| <b>Evangelista<br/>LS* (37)<br/>2014<br/>USA</b> | Prospective<br>Single-arm<br>Cohort Study<br><br><br><br><br><br>Outpatient<br>consultations | N = 29<br><br>Mean Age (SD)<br>= 54.1 (8.4)<br><br>Sex: M = 75.9;<br>F = 24.1<br><br>NYHA class II<br>= 20 (69.0%)<br>NYHA class III<br>= 9 (31.0%)<br><br>Mean LVEF =<br>25.9% (5.3) | N = 7<br><br>Mean Age (SD)<br>= 52.7 (6.3)<br><br>Sex: M = 57.1;<br>F = 42.9<br><br>NYHA class II<br>= 5 (71.4%)<br>NYHA class III<br>= 2 (28.6%)<br><br>Mean LVEF =<br>23.1% (4.3) | <u>Palliative Care</u><br>Comprehensive physical and psychosocial assessment, discussions about advance care planning, developed a treatment plan (with participants) and listing goals of care.<br><br>Providers: Palliative care specialist (e.g. physician or advance practice nurse).<br><br><u>'Intervention group'</u><br>Participants receiving palliative care consultation and follow up.<br><br><u>'Comparator group'</u><br>Participants receiving initial palliative care consultation only. | 1. Symptom rating<br>2. Type of palliative care, focus of care, medication use | 1. Improvement in symptom burden in those who were followed up (p < 0.001).<br>2. Patients who chose to have additional palliative care input were referred to: <ul style="list-style-type: none"><li>Pharmacist for new medication (69%) or changes to their medication (24%)</li><li>social work support (69%)</li><li>physical and occupational therapists (66%)</li></ul> |

Supplementary table 2: Characteristics of included studies

|                                |                                                              |                                                                                                                                                                                                                                 |                                                                                                                                                                                                                                                                                                                                                                                                              |                                                                                                                                            |                                                                                                                                                                                                                                                                                                                                                                  |
|--------------------------------|--------------------------------------------------------------|---------------------------------------------------------------------------------------------------------------------------------------------------------------------------------------------------------------------------------|--------------------------------------------------------------------------------------------------------------------------------------------------------------------------------------------------------------------------------------------------------------------------------------------------------------------------------------------------------------------------------------------------------------|--------------------------------------------------------------------------------------------------------------------------------------------|------------------------------------------------------------------------------------------------------------------------------------------------------------------------------------------------------------------------------------------------------------------------------------------------------------------------------------------------------------------|
|                                |                                                              |                                                                                                                                                                                                                                 |                                                                                                                                                                                                                                                                                                                                                                                                              |                                                                                                                                            | <ul style="list-style-type: none"><li>psychiatrists (55%)</li><li>chaplain (45%)</li><li>home health (83%)</li><li>support groups (31%) and</li><li>hospice (7%).</li></ul>                                                                                                                                                                                      |
| <b>Taylor GJ (38) 2017 USA</b> | Retrospective Single-arm Cohort Study<br><br>Community based | N = 32<br><br>Age Range (Median) = 48-94 (70)<br><br>Sex: M = 100; F = 0<br><br>NYHA class III = 2 (6.7%)<br>NYHA class IV = 28 (93.3%)<br><br>No specific data on LVEF, but 23 patients had HFrEF (LVEF <30%) and 7 had HFpEF. | <u>Intervention</u><br>Home-delivered palliative care with intensive guidelines-directed medical therapy using the standard hospice approach to psychosocial and spiritual aspects of end-of-life care, optimising the drug therapy, and laboratory evaluation when clinically indicated.<br><br>Providers: Home-hospice nurses, cardiologists, social workers, chaplains, and volunteers.<br><br>No control | <ol style="list-style-type: none"><li>Re-hospitalisations</li><li>Death at home</li><li>NYHA functional class</li><li>BNP levels</li></ol> | <ol style="list-style-type: none"><li>Drop in hospital admissions from 110 admissions in the 6 months prior to enrolment to 26 admissions after enrolment.</li><li>18 out of the 21 patients who died, did so at home.</li><li>Improvement in pre-post NYHA class IV versus NYHA class III (p &lt; 0.001).</li><li>Improvement in BNP levels following</li></ol> |

Supplementary table 2: Characteristics of included studies

|                                                |                                                                         |                                                                                                                                                             |                                                                                |                                                                                                                                                                                                                                                                                                              |                                                                                                                                                 |                                                                                                                                                                                                         |
|------------------------------------------------|-------------------------------------------------------------------------|-------------------------------------------------------------------------------------------------------------------------------------------------------------|--------------------------------------------------------------------------------|--------------------------------------------------------------------------------------------------------------------------------------------------------------------------------------------------------------------------------------------------------------------------------------------------------------|-------------------------------------------------------------------------------------------------------------------------------------------------|---------------------------------------------------------------------------------------------------------------------------------------------------------------------------------------------------------|
|                                                |                                                                         |                                                                                                                                                             |                                                                                |                                                                                                                                                                                                                                                                                                              |                                                                                                                                                 | treatment with L-dopa<br>(p = 0.014).                                                                                                                                                                   |
| <b>Wong RC<br/>(39)<br/>2013<br/>Singapore</b> | Prospective<br>Single-arm<br><br>Cohort Study<br><br>Community<br>based | N = 44<br><br>Mean Age (SD) = 79 (9)<br><br>Sex: M = 38.6; F = 61.4<br><br>NYHA class III = 31 (70.0%)<br>NYHA class IV = 13 (30.0%)<br><br>No data on LVEF |                                                                                | <u>Home Palliative Care Program</u><br>Measure patient's physiological<br>parameters, physical examination<br>to elicit relevant signs and<br>symptoms, medication<br>modification or initiation to palliate<br>patient's symptoms.<br><br>Providers: Doctor, nurse and/ or<br>counsellor.<br><br>No control | 1. HF hospitalisation<br>2. All cause<br>hospitalisation<br>3. Time to death                                                                    | 1. Mean HF<br>hospitalisation<br>improved from baseline<br>(p < 0.0001).<br>2. Mean all-cause<br>hospitalisation<br>improved from baseline<br>(p < 0.0001).<br>3. Mean time to death was<br>5.5 months. |
| <b>Cassel JB<br/>(40)<br/>2016<br/>USA</b>     | Retrospective<br>Case-Control<br>Study<br><br>Community<br>based        | N = 174<br><br>Mean Age (SD)<br>= 87.5 (6.6)<br><br>Sex: M = 44.3;<br>F = 55.7                                                                              | N = 499<br><br>Mean Age (SD)<br>= 87.1 (6.4)<br><br>Sex: M = 43.7;<br>F = 56.3 | <u>Transitions</u><br>Concurrent care home-based<br>program including in home medical<br>consultation, ongoing<br>prognostication, caregiver support,<br>advance healthcare planning,<br>symptom management, education,                                                                                      | 1. Costs:<br>a. Costs per month<br>for hospital care<br>b. Costs per month<br>for other care<br>c. All costs per<br>month<br>2. Hospitalisation | 1. Improvement in costs<br>per month for hospital<br>care (p < 0.001) and all<br>costs per month (p <<br>0.001) in the<br>Transitions participants.<br>NSD in costs per month<br>for other care.        |



Supplementary table 2: Characteristics of included studies

|                                         |                                      |                                             |                                             |                                                                                                                                                                            |                                                                                                                                                                                                                                                                                                            |                                                                                                                                                                                                                                                                                                                                                                                                                                                 |
|-----------------------------------------|--------------------------------------|---------------------------------------------|---------------------------------------------|----------------------------------------------------------------------------------------------------------------------------------------------------------------------------|------------------------------------------------------------------------------------------------------------------------------------------------------------------------------------------------------------------------------------------------------------------------------------------------------------|-------------------------------------------------------------------------------------------------------------------------------------------------------------------------------------------------------------------------------------------------------------------------------------------------------------------------------------------------------------------------------------------------------------------------------------------------|
|                                         |                                      | No data on<br>NYHA Class or<br>LVEF         | No data on<br>NYHA Class or<br>LVEF         | and psychosocial and spiritual<br>support.<br><br>Providers: Doctors, nurses, spiritual<br>care providers, and social workers.<br><br><u>Comparator</u><br>No information. | <p>a. Percentage hospitalised at least once</p> <p>b. Number of hospitalisations per month</p> <p>c. Number of hospital days per month</p> <p>d. 30-day readmission rate</p> <p>e. ICU stay during admission within 30 days of death</p> <p>3. Admission within 30 days of death and death in hospital</p> | <p>2. Lower percentage of patients hospitalised at least once, fewer number of hospitalisations per month, fewer number of hospital days per month, lower rate of 30-day readmission and lower rate of ICU stay prior to death (<math>p &lt; 0.001</math>) in the intervention arm.</p> <p>3. Lower percentage of patients from the Transitions arm were admitted within 30 days of death and dying in hospital (<math>P &lt; 0.001</math>)</p> |
| <b>Evangelista<br/>LS (41)<br/>2012</b> | Prospective<br>Case-Control<br>Study | N = 36<br><br>Mean Age (SD)<br>= 53.9 (8.0) | N = 36<br><br>Mean Age (SD)<br>= 53.3 (8.7) | <u>Palliative care consultation</u><br>Assessment of current medical<br>status and screening intake,<br>evaluation of patient's goals and                                  | <p>1. Symptom burden</p> <p>2. Depression</p> <p>3. Quality of life</p>                                                                                                                                                                                                                                    | <p>1. Lower symptom burden following intervention (<math>p = 0.031</math>).</p>                                                                                                                                                                                                                                                                                                                                                                 |

Supplementary table 2: Characteristics of included studies

|                                  |                                           |                                                                                                                            |                                                                                                                            |                                                                                                                                                                                                                                |                                                                                                   |                                                                                                                                                                                                                         |
|----------------------------------|-------------------------------------------|----------------------------------------------------------------------------------------------------------------------------|----------------------------------------------------------------------------------------------------------------------------|--------------------------------------------------------------------------------------------------------------------------------------------------------------------------------------------------------------------------------|---------------------------------------------------------------------------------------------------|-------------------------------------------------------------------------------------------------------------------------------------------------------------------------------------------------------------------------|
| USA                              | 1 Outpatient consultation                 | Sex: M = 72.2;<br>F = 27.8<br><br>NYHA class II = 25 (69.4%)<br>NYHA class III = 11 (30.6%)<br><br>Mean LVEF = 25.4% (5.2) | Sex: M = 69.4;<br>F = 30.6<br><br>NYHA class II = 26 (72.2%)<br>NYHA class III = 10 (27.8%)<br><br>Mean LVEF = 26.0% (6.2) | preferences, assessment of areas of perceived needs and establish a treatment plan with co-ordination of care.<br><br>Providers: Palliative care physician or advance practice nurse.<br><br><u>Control</u><br>No information. |                                                                                                   | 2. Lower depression following intervention (p = 0.034).<br>3. Quality of life significantly improved following intervention (p = 0.015).                                                                                |
| Blecker S<br>(42)<br>2011<br>USA | Cross-Sectional Study<br><br>Hospice Care | N = 6,436<br><br>Mean Age (SD) = 85.0 (7.6)<br><br>Sex: M = 39.5;<br>F = 60.5<br><br>No data on NYHA Class or LVEF         | N = 10,177<br><br>Mean Age (SD) = 83.6 (7.9)<br><br>Sex: M = 44.5;<br>F = 55.5<br><br>No data on NYHA Class or LVEF        | <u>Intervention</u><br>Hospice care<br><br><u>Comparator</u><br>No claims for hospice care                                                                                                                                     | 1. Costs<br>2. Resource use – hospitalisations, ICU admission, length of stay in hospital and ICU | 1. Higher total adjusted expenditures in hospice care.<br>2. Hospice care patients were less likely to be admitted to hospital or have ICU stay during this time, and spent significantly less time in hospital or ICU. |

*Note: Evangelista LS 2014† is titled: On-going palliative care enhances perceived control and patient activation and reduces symptom distress in patients with symptomatic heart failure: A pilot study and Evangelista LS 2014\* is titled: Does the Type and Frequency of Palliative Care Services Received by Patients with Advanced Heart Failure Impact Symptom Burden?*

*◇ is used where there is no subset analysis of CHF population in mixed population studies.*

*Abbreviations: NYHA = New York Heart Association; LVEF = Left Ventricular Ejection Fraction; RCT = Randomised Controlled Trial; CHF = Congestive Heart Failure; SD = Standard Deviation; HF = Heart Failure; KCCQ = Kansas City Cardiomyopathy Questionnaire; PHQ-9 = Patient Health Questionnaire-9; ACP = Advance Care Planning; NSD = no significant difference; LOS = length of stay.*

Supplementary table 3: Breakdown of palliative care components delivered in the included studies

| Study                | Components of palliative care | Assessment of current status | Assessment of need | Assessment of quality of life | Symptom management | Psychological support | Social support | Spiritual support | Medication review and monitoring | Tele-health and monitoring | Patient education | Goal setting | Advance care planning | Coordination of care | Multidisciplinary involvement | Carer/ family support |
|----------------------|-------------------------------|------------------------------|--------------------|-------------------------------|--------------------|-----------------------|----------------|-------------------|----------------------------------|----------------------------|-------------------|--------------|-----------------------|----------------------|-------------------------------|-----------------------|
| Aiken LS (20)        |                               | ✓                            | ✓                  |                               | ✓                  | ✓                     | ✓              |                   | ✓                                |                            | ✓                 |              | ✓                     | ✓                    | ✓                             | ✓                     |
| Bekelman DB (21)     |                               | ✓                            | ✓                  | ✓                             | ✓                  | ✓                     |                |                   | ✓                                | ✓                          | ✓                 |              |                       |                      | ✓                             |                       |
| Brännström M (22)    |                               | ✓                            | ✓                  | ✓                             | ✓                  |                       |                |                   |                                  | ✓                          | ✓                 | ✓            | ✓                     | ✓                    | ✓                             | ✓                     |
| Hopp FP (23)         |                               |                              | ✓                  |                               |                    |                       |                |                   |                                  |                            |                   | ✓            | ✓                     |                      | ✓                             |                       |
| Rogers JG (24)       |                               | ✓                            | ✓                  | ✓                             | ✓                  | ✓                     | ✓              | ✓                 | ✓                                |                            |                   | ✓            |                       | ✓                    | ✓                             |                       |
| Sahlen KG (25)       |                               | ✓                            | ✓                  | ✓                             | ✓                  |                       |                |                   |                                  | ✓                          | ✓                 | ✓            | ✓                     | ✓                    | ✓                             | ✓                     |
| Sidebottom AC (26)   |                               | ✓                            | ✓                  | ✓                             | ✓                  | ✓                     | ✓              | ✓                 | ✓                                |                            |                   |              | ✓                     | ✓                    | ✓                             |                       |
| Wong FKY (27)        |                               | ✓                            | ✓                  | ✓                             | ✓                  |                       |                |                   |                                  | ✓                          |                   | ✓            | ✓                     |                      | ✓                             |                       |
| Paes P (28)          |                               | ✓                            | ✓                  | ✓                             | ✓                  | ✓                     |                |                   | ✓                                |                            | ✓                 |              | ✓                     |                      | ✓                             |                       |
| Bakitas M (29)       |                               | ✓                            | ✓                  | ✓                             | ✓                  |                       |                |                   |                                  | ✓                          | ✓                 | ✓            |                       |                      | ✓                             | ✓                     |
| O'Donnell A (30)     |                               | ✓                            | ✓                  | ✓                             | ✓                  | ✓                     | ✓              | ✓                 | ✓                                |                            | ✓                 | ✓            | ✓                     | ✓                    | ✓                             | ✓                     |
| Johnson MJ (31)      |                               | ✓                            | ✓                  | ✓                             | ✓                  | ✓                     | ✓              | ✓                 | ✓                                |                            | ✓                 | ✓            | ✓                     | ✓                    | ✓                             | ✓                     |
| Tadwalkar R (32)     |                               |                              | ✓                  | ✓                             |                    | ✓                     |                | ✓                 |                                  |                            |                   |              |                       |                      | ✓                             |                       |
| Connor SR (33)       |                               | NR                           | NR                 | NR                            | NR                 | NR                    | NR             | NR                | NR                               | NR                         | NR                | NR           | NR                    | NR                   | NR                            | NR                    |
| Enguidanos SM (34)   |                               | ✓                            | ✓                  |                               | ✓                  | ✓                     | ✓              | ✓                 |                                  |                            |                   | ✓            | ✓                     | ✓                    | ✓                             |                       |
| Pattenden JF (35)    |                               | ✓                            | ✓                  |                               | ✓                  | ✓                     |                |                   | ✓                                |                            | ✓                 |              |                       |                      | ✓                             | ✓                     |
| Evangelista LS† (36) |                               | ✓                            | ✓                  |                               | ✓                  | ✓                     |                |                   |                                  | ✓                          | ✓                 | ✓            | ✓                     | ✓                    | ✓                             |                       |
| Evangelista LS* (37) |                               | ✓                            | ✓                  |                               | ✓                  | ✓                     | ✓              | ✓                 | ✓                                |                            |                   | ✓            | ✓                     | ✓                    | ✓                             |                       |
| Taylor GJ (38)       |                               | ✓                            | ✓                  |                               | ✓                  | ✓                     | ✓              | ✓                 | ✓                                | ✓                          |                   |              | ✓                     | ✓                    | ✓                             |                       |
| Wong RC (39)         |                               | ✓                            | ✓                  |                               | ✓                  |                       |                |                   | ✓                                | ✓                          |                   |              | ✓                     |                      | ✓                             |                       |
| Cassel JB (40)       |                               | ✓                            | ✓                  | ✓                             | ✓                  | ✓                     | ✓              | ✓                 |                                  | ✓                          | ✓                 | ✓            | ✓                     | ✓                    | ✓                             | ✓                     |
| Evangelista LS (41)  |                               | ✓                            | ✓                  | ✓                             | ✓                  | ✓                     | ✓              |                   | ✓                                |                            | ✓                 | ✓            | ✓                     |                      | ✓                             |                       |
| Blecker S (42)       |                               | NR                           | NR                 | NR                            | NR                 | NR                    | NR             | NR                | NR                               | NR                         | NR                | NR           | NR                    | NR                   | NR                            | NR                    |

Supplementary table 4: Results of risk of bias assessment with the Cochrane Risk of Bias tool

| Study                   | Adequate sequence generation? | Allocation concealment? | Blinding (participants and personnel) | Blinding (outcome assessors) | Incomplete outcome data addressed? | Free of selective reporting? |
|-------------------------|-------------------------------|-------------------------|---------------------------------------|------------------------------|------------------------------------|------------------------------|
| Aiken LS 2006 (20)      | ✓                             | ✓                       | ✗                                     | ✓                            | ✗                                  | ✓                            |
| Bekelman DB 2015 (21)   | ✓                             | ✓                       | ✗                                     | ✓                            | ✓                                  | ✓                            |
| Brännström M 2014 (22)  | ✓                             | ✓                       | ✗                                     | ✗                            | ◇                                  | ✓                            |
| Hopp FP 2016 (23)       | ◇                             | ◇                       | ✗                                     | ✗                            | ✓                                  | ✗                            |
| Rogers JG 2017 (24)     | ✓                             | ◇                       | ✗                                     | ✗                            | ✓                                  | ✓                            |
| Sahlen KG 2015 (25)     | ✓                             | ✓                       | ✗                                     | ✗                            | ✓                                  | ✓                            |
| Sidebottom AC 2015 (26) | ◇                             | ◇                       | ✗                                     | ✗                            | ✓                                  | ✓                            |
| Wong FKY 2016 (27)      | ✓                             | ✓                       | ✗                                     | ✓                            | ✓                                  | ✓                            |
| Paes P 2005* (28)       | ✓                             | ✗                       | ✗                                     | ✗                            | ✗                                  | ✓                            |
| Bakitas M 2017 (29)     | N/A                           | N/A                     | ✗                                     | ✗                            | ✓                                  | ✓                            |
| Tadwalkar R 2014 (32)   | N/A                           | N/A                     | ✗                                     | ✗                            | ◇                                  | ✓                            |
| O'Donnell A 2018 (30)   | ✓                             | ◇                       | ✗                                     | ◇                            | ✓                                  | ✓                            |

\* Derived from the full thesis on which the letter was based and not from the limited information in the published letter.

N/A = not applicable

Key: ✓ = low risk of bias, ✗ = high risk of bias, ◇ = risk of bias unclear

Supplementary table 5: Results of NOS risk of bias assessment for cohort studies

| Study                     | Representativeness of exposed cohort | Selection of non-exposed cohort | Ascertainment of exposure | Outcome of interest not present at start of study | Comparability of cohorts | Assessment of outcome | Length of follow up | Adequacy of follow up |
|---------------------------|--------------------------------------|---------------------------------|---------------------------|---------------------------------------------------|--------------------------|-----------------------|---------------------|-----------------------|
| Connor SR 2007 (33)       | ★                                    | ★                               | ★                         | ★                                                 | ★                        | ★                     | ★                   | ★                     |
| Enguidanos SM 2005 (34)   | ★                                    | ★                               | ★                         | ★                                                 | ★                        | ★                     | ★                   | ★                     |
| Pattenden JF 2013 (35)    | ★                                    | ★                               | ★                         | ★                                                 | ★                        | ★                     | ★                   | ★                     |
| Evangelista LS 2014† (36) | ★                                    | ★                               | ★                         | ★                                                 | ★                        | ★                     | ★                   | ★                     |
| Evangelista LS 2014* (37) | ★                                    | ★                               | ★                         | ★                                                 | ★                        | ★                     | ★                   | ★                     |
| Taylor GJ 2017 (38)       | ★                                    | ★                               | ★                         | ★                                                 | ★                        | ★                     | ★                   | ★                     |
| Wong RC 2013 (39)         | ★                                    | ★                               | ★                         | ★                                                 | ★                        | ★                     | ★                   | ★                     |
| Johnson MJ 2018* (31)     | ★                                    | ★                               | ★                         | ★                                                 | ★                        | ★                     | ★                   | ★                     |

Key: ★ = low risk of bias, ★ = high risk of bias, ★ = risk of bias unclear

\* Designed as a nonrandomised feasibility study rather than to examine outcomes, but methods more suited to quality appraisal as observational data.

Supplementary table 6: Results of NOS risk of bias assessment for case-control studies

| Study                    | Adequate case definition | Representativeness of cases | Selection of controls | Definition of controls | Comparability of cases and controls | Ascertainment of exposure | Same method of ascertainment for cases and controls | Non-response rate |
|--------------------------|--------------------------|-----------------------------|-----------------------|------------------------|-------------------------------------|---------------------------|-----------------------------------------------------|-------------------|
| Cassel JB 2016 (40)      | ★                        | ★                           | ★                     | ★                      | ★                                   | ★                         | ★                                                   | ★                 |
| Evangelista LS 2012 (41) | ★                        | ★                           | ★                     | ★                      | ★                                   | ★                         | ★                                                   | ★                 |

Key: ★ = low risk of bias, ★ = high risk of bias, ★ = risk of bias unclear

Supplementary table 1: Example search string from Ovid Medline

| Search string                  | Search team                                                                               |
|--------------------------------|-------------------------------------------------------------------------------------------|
| Free text search               |                                                                                           |
| 1                              | Heart failure.mp.                                                                         |
| 2                              | Cardiac failure.mp.                                                                       |
| 3                              | Congestive heart failure.mp.                                                              |
| 4                              | Ventric* dysfunction.mp.                                                                  |
| 5                              | Cardiac dysfunction.mp.                                                                   |
| 6                              | Systolic dysfunction.mp.                                                                  |
| 7                              | Cardiac insufficiency.mp.                                                                 |
| 8                              | Myocardi* insufficiency.mp.                                                               |
| 9                              | Ventric* insufficiency.mp.                                                                |
| 10                             | Myocardi* dysfunction.mp.                                                                 |
| 11                             | Myocardi* failure.mp.                                                                     |
| 12                             | Ventric* failure.mp.                                                                      |
| 13                             | HF.mp.                                                                                    |
| 14                             | CHF.mp.                                                                                   |
| 15                             | CCF.mp.                                                                                   |
| 16                             | LVSD.mp.                                                                                  |
| 17                             | 1 or 2 or 3 or 4 or 5 or 6 or 7 or 8 or<br>9 or 10 or 11 or 12 or 13 or 14 or 15<br>or 16 |
| Medical Subject Heading search |                                                                                           |
| 18                             | exp Heart failure/                                                                        |
| 19                             | exp Ventricular dysfunction/ or exp<br>Stroke Volume/ or exp Heart<br>diseases            |



|                         |                                                                                              |
|-------------------------|----------------------------------------------------------------------------------------------|
| <b>20</b>               | 18 or 19                                                                                     |
| <b>Free text search</b> |                                                                                              |
| <b>21</b>               | Advanced.mp.                                                                                 |
| <b>22</b>               | Chronic.mp.                                                                                  |
| <b>23</b>               | Terminal.mp.                                                                                 |
| <b>24</b>               | End stage.mp.                                                                                |
| <b>25</b>               | Moderate.mp.                                                                                 |
| <b>26</b>               | Severe.mp.                                                                                   |
| <b>27</b>               | Progressive.mp.                                                                              |
| <b>28</b>               | Persisitent.mp.                                                                              |
| <b>29</b>               | Fatal.mp.                                                                                    |
| <b>30</b>               | Limiting.mp.                                                                                 |
| <b>31</b>               | Incurable.mp.                                                                                |
| <b>32</b>               | Unremitting.mp.                                                                              |
| <b>33</b>               | Decompensated.mp.                                                                            |
| <b>34</b>               | NYHA class III.mp.                                                                           |
| <b>35</b>               | NYHA class IV.mp.                                                                            |
| <b>36</b>               | 21 or 22 or 23 or 24 or 25 or 26 or 27<br>or 28 or 29 or 30 or 31 or 32 or 33 or<br>34 or 35 |
| <b>Free text search</b> |                                                                                              |
| <b>37</b>               | Palliat*.mp.                                                                                 |
| <b>38</b>               | Terminal care.mp.                                                                            |
| <b>39</b>               | Hospice*.mp.                                                                                 |
| <b>40</b>               | End of life care.mp.                                                                         |
| <b>41</b>               | Holistic.mp.                                                                                 |

1  
2  
3  
4  
5  
6  
7  
8  
9  
10  
11  
12  
13  
14  
15  
16  
17  
18  
19  
20  
21  
22  
23  
24  
25  
26  
27  
28  
29  
30  
31  
32  
33  
34  
35  
36  
37  
38  
39  
40  
41  
42  
43  
44  
45  
46  
47  
48  
49  
50  
51  
52  
53  
54  
55  
56  
57  
58  
59  
60

|                                |                                                                               |
|--------------------------------|-------------------------------------------------------------------------------|
| 42                             | Respite.mp.                                                                   |
| 43                             | Supportive care.mp.                                                           |
| 44                             | Care of the dying.mp.                                                         |
| 45                             | Patient centred care.mp.                                                      |
| 46                             | Advance* care                                                                 |
| 47                             | Advance* directive                                                            |
| 48                             | 37 or 38 or 39 or 40 or 41 or 42 or 43<br>or 44 or 45 or 46 or 47             |
| Medical Subject Heading search |                                                                               |
| 49                             | exp Palliative care                                                           |
| 50                             | exp "Quality of Life"/ or exp<br>Palliative Medicine/ or exp Terminal<br>Care |
| 51                             | exp Hospices/ or exp Hospice Care/                                            |
| 52                             | exp Holistic Health                                                           |
| 53                             | exp Home Nursing/ or exp Respite<br>Care/ or Home Care Services/              |
| 54                             | exp Patient-Centred Care/                                                     |
| 55                             | exp Advance Care planning/                                                    |
| 56                             | exp Advance directives/                                                       |
| 57                             | 49 or 50 or 51 or 52 or 53 or 54 or 55<br>or 56                               |
| Drawing search terms together  |                                                                               |
| 58                             | 17 or 20                                                                      |
| 59                             | 36 and 58                                                                     |
| 60                             | 48 or 57                                                                      |
| 61                             | 59 and 60                                                                     |

Supplementary table 2: Characteristics of included studies

| First author, year and country    | Study setting                      | Participants: sample size (n), age (years), sex (%), disease characteristics (NYHA Class, LVEF) |                                    | Intervention and Comparator                                                                                                                                                                                | Outcomes                                                                                                                                                                                                                                    | Results                                                                                                                                                                                                                                                                                                                                |
|-----------------------------------|------------------------------------|-------------------------------------------------------------------------------------------------|------------------------------------|------------------------------------------------------------------------------------------------------------------------------------------------------------------------------------------------------------|---------------------------------------------------------------------------------------------------------------------------------------------------------------------------------------------------------------------------------------------|----------------------------------------------------------------------------------------------------------------------------------------------------------------------------------------------------------------------------------------------------------------------------------------------------------------------------------------|
|                                   |                                    | Intervention                                                                                    | Comparator                         |                                                                                                                                                                                                            |                                                                                                                                                                                                                                             |                                                                                                                                                                                                                                                                                                                                        |
| Interventional studies            |                                    |                                                                                                 |                                    |                                                                                                                                                                                                            |                                                                                                                                                                                                                                             |                                                                                                                                                                                                                                                                                                                                        |
| Aiken LS<br>(2120)<br>2006<br>USA | Evaluation phase RCT               | Note: Mixed population study with subset analysis of CHF patients in some outcome measures.     |                                    | <u>PhoenixCare</u><br>Home-based palliative care focused on disease and symptom management, patient and caregiver education on disease management, and social and psychological support.                   | 1. Self-management of illness and knowledge of resources<br><br>2. Preparation for end of life<br><br>3. Physical and mental functioning<br>a. Participation in enjoyable activities<br>b. Symptom control<br>c. Trajectories of mental and | 1. Greater information for self-management, greater appreciation of resources available to help with their illness and initially, better preparedness for daily experiences in the intervention arm. ♦<br><br>2. PhoenixCare participants showed a higher rate of having a living will or advance directive vs controls. (p < 0.05). ♦ |
|                                   | Community based and Hospital based | N = 100<br>(patients with CHF = 67)                                                             | N = 90<br>(patients with CHF = 62) | Providers: Registered nurse case manager (co-ordinator), primary care physician, health-plan case manager, and community agencies supported by a medical director, social worker, and pastoral counsellor. |                                                                                                                                                                                                                                             |                                                                                                                                                                                                                                                                                                                                        |
|                                   |                                    | Mean Age (SD) = 68 (14)                                                                         | Mean Age (SD) = 70 (13)            |                                                                                                                                                                                                            |                                                                                                                                                                                                                                             |                                                                                                                                                                                                                                                                                                                                        |
|                                   |                                    | Sex: M = 42.0; F = 58.0                                                                         | Sex: M = 30.0; F = 70.0            |                                                                                                                                                                                                            |                                                                                                                                                                                                                                             |                                                                                                                                                                                                                                                                                                                                        |

Supplementary table 2: Characteristics of included studies

|                                                |                                                                                                             |                                                                                                                                                   |                                                                                                                                                    |                                                                                                                                                                                                                                                                                                                                                       |                                                                                        |                                                                                                                                                                                                                                                                             |
|------------------------------------------------|-------------------------------------------------------------------------------------------------------------|---------------------------------------------------------------------------------------------------------------------------------------------------|----------------------------------------------------------------------------------------------------------------------------------------------------|-------------------------------------------------------------------------------------------------------------------------------------------------------------------------------------------------------------------------------------------------------------------------------------------------------------------------------------------------------|----------------------------------------------------------------------------------------|-----------------------------------------------------------------------------------------------------------------------------------------------------------------------------------------------------------------------------------------------------------------------------|
|                                                |                                                                                                             | No data on<br>NYHA Class or<br>LVEF                                                                                                               | No data on<br>NYHA Class or<br>LVEF                                                                                                                | Medical and disease orientated care<br>included medication and technical<br>treatment and other support service.<br><br>Providers: Managed care<br>organisations.                                                                                                                                                                                     | physical<br>functioning<br><br>4. Utilisation of<br>medical service                    | <a href="#">1-3a.</a> NSD in CHF.<br><a href="#">2-3b.</a> High symptom<br>distress in PhoenixCare<br>(p < 0.05).<br><a href="#">3-3c.</a> NSD in mental and<br>physical functioning<br>among CHF control.<br>4. Relatively unchanged<br>over time with NSD<br>across arms. |
| <b>Bekelman<br/>DB (2221)<br/>2015<br/>USA</b> | Evaluation<br>phase RCT<br>with >80%<br>power<br><br>Community<br>based with<br>outpatient<br>consultations | N = 187<br><br>Mean Age (SD)<br>= 68.3 (9.6)<br><br>Sex: M = 95.2;<br>F = 4.8<br><br>NYHA class I<br>= 16 (8.9%)<br>NYHA class II<br>= 77 (42.8%) | N = 197<br><br>Mean Age (SD)<br>= 67.9 (10.6)<br><br>Sex: M = 98.0;<br>F = 2.0<br><br>NYHA class I<br>= 16 (8.5%)<br>NYHA class II<br>= 85 (45.0%) | <u>Patient-Centred Disease<br/>Management</u><br><br>Multidisciplinary collaborative care<br>of HF disease management,<br>screening for and treatment of<br>depression and telemonitoring with<br>patient self-care support.<br><br>Providers: Registered nurse (co-<br>ordinator), primary care physician,<br>psychiatrist.<br><br><u>Usual Care</u> | 1. HF-specific health<br>status<br>2. Depression<br>3. Mortality<br>4. Hospitalisation | 1. NSD in KCCQ overall<br>score.<br>2. Greater improvement in<br>PHQ-9 in the<br>intervention arm (p =<br>0.01).<br>3. Fewer patients died in<br>the intervention arm (p<br>= 0.04).<br>4. NSD in hospitalisations.                                                         |

Supplementary table 2: Characteristics of included studies

|                                                    |                                                                                          |                                                                                                                                                                                   |                                                                                                                                                                                    |                                                                                                                                                                                                                                                                     |                                                                                                                                                                         |                                                                                                                                                                                                                        |
|----------------------------------------------------|------------------------------------------------------------------------------------------|-----------------------------------------------------------------------------------------------------------------------------------------------------------------------------------|------------------------------------------------------------------------------------------------------------------------------------------------------------------------------------|---------------------------------------------------------------------------------------------------------------------------------------------------------------------------------------------------------------------------------------------------------------------|-------------------------------------------------------------------------------------------------------------------------------------------------------------------------|------------------------------------------------------------------------------------------------------------------------------------------------------------------------------------------------------------------------|
|                                                    |                                                                                          | NYHA class III<br>= 82 (45.6%)<br>NYHA class IV<br>= 5 (2.8%)<br><br>LVEF:<br>Normal = 78<br>(45.6%)<br>Mild = 34<br>(19.9%)<br>Moderate = 46<br>(26.9%)<br>Severe = 13<br>(7.6%) | NYHA class III<br>= 82 (43.4%)<br>NYHA class IV<br>= 6 (3.2%)<br><br>LVEF:<br>Normal = 84<br>(47.5%)<br>Mild = 34<br>(19.2%)<br>Moderate = 32<br>(18.1%)<br>Severe = 27<br>(15.3%) | Regular care at the discretion of health care provider. Information sheets for self-care given and if patients screened positive for depression at baseline, primary care physicians were notified.<br><br>Providers: Regular health care professionals and nurses. |                                                                                                                                                                         |                                                                                                                                                                                                                        |
| <b>Brännström<br/>M (2322)<br/>2014<br/>Sweden</b> | Evaluation phase RCT with 80% power<br><br>Community based with outpatient consultations | N = 36<br><br>Mean Age (SD) = 81.9 (7.2)<br><br>Sex: M = 72.2; F = 27.8                                                                                                           | N = 36<br><br>Mean Age (SD) = 76.6 (10.2)<br><br>Sex: M = 69.4; F = 30.6                                                                                                           | <u>Palliative advanced home care and heart failure care (PREFER) model</u><br>Person-centred care, total care including assessment of symptoms, quality of life, and risk, and registration into HF and palliative care registry.                                   | 1. Symptom burden<br>2. Health related quality of life<br>3. Disease-specific quality of life<br>4. Functional classes<br>5. Hospitalisation<br>6. Resource utilisation | 1. NSD in overall score<br>2. Age-adjusted health related quality of life was better in PREFER group (p = 0.02).<br>3. NSD in overall disease specific quality of life.<br>4. Improved mean NYHA class (p = 0.012) and |

Supplementary table 2: Characteristics of included studies

|                                            |                                                                            |                                                                                                                                                        |                                                                                                                                                        |                                                                                                                                                                                                                                                                                                           |                                                                                                        |                                                                                                                                                                                                                                                                                                                                                                                           |
|--------------------------------------------|----------------------------------------------------------------------------|--------------------------------------------------------------------------------------------------------------------------------------------------------|--------------------------------------------------------------------------------------------------------------------------------------------------------|-----------------------------------------------------------------------------------------------------------------------------------------------------------------------------------------------------------------------------------------------------------------------------------------------------------|--------------------------------------------------------------------------------------------------------|-------------------------------------------------------------------------------------------------------------------------------------------------------------------------------------------------------------------------------------------------------------------------------------------------------------------------------------------------------------------------------------------|
|                                            |                                                                            | NYHA class III<br>= 28 (77.8%)<br>NYHA class IV<br>= 8 (22.2%)<br><br>LVEF:<br>40-49% = 13<br>(36.1%)<br>30-39% = 16<br>(44.4%)<br><30% = 7<br>(19.4%) | NYHA class III<br>= 23 (63.9%)<br>NYHA class IV<br>= 11 (30.6%)<br><br>LVEF:<br>40-49% = 12<br>(33.3%)<br>30-39% = 21<br>(58.3%)<br><30% = 3<br>(8.3%) | Providers: Specialised nurses,<br>palliative care nurses, cardiologist,<br>palliative care physician,<br>physiotherapist, and occupational<br>therapist.<br><br><u>Usual care</u><br>No information.<br><br>Providers: General practitioners or<br>doctors and/ or the nurse-led heart<br>failure clinic. |                                                                                                        | more experienced<br>improved NYHA class<br>(p = 0.015) in the<br>PREFER arm.<br><br>5. Fewer hospitalisations<br>in the PREFER group (p<br>= 0.009); with fewer<br>days spent in hospital (p<br>= 0.0011); NSD in<br>mortality<br><br>6. Utilisation of visits<br>differed significantly<br>between the two arms in<br>favour of the<br>intervention, but precise<br>results are unclear. |
| <b>Hopp FP<br/>(2423)<br/>2016<br/>USA</b> | Evaluation<br>phase RCT<br>with approx.<br>80% power<br><br>Hospital based | N = 43<br><br>Mean Age (SD)<br>= 67.0 (11.0)<br><br>Sex: M = 60.5;<br>F = 39.5                                                                         | N = 42<br><br>Mean Age (SD)<br>= 68.0 (13.0)<br><br>Sex: M = 42.9;<br>F = 57.1                                                                         | <u>Palliative Care Consultation</u><br>Clinical interviews to assess for<br>uncontrolled symptoms, goals of<br>care, advance care planning, code<br>status, and desired post-treatment<br>residential setting.                                                                                            | 1. Election vs non-<br>election of comfort<br>care<br>a. Outpatient<br>hospice<br>b. Inpatient hospice | 1. NSD in the primary end<br>point.<br>2. NSD in mortality.                                                                                                                                                                                                                                                                                                                               |

Supplementary table 2: Characteristics of included studies

|                                          |                                               |                                                                                |                                                                                |                                                                                                                                                                                                                                                                                                                                                                                                                                                           |                                                                                                                                                                                                                        |                                                                                                                                                                                                                                                                                                                                                                              |
|------------------------------------------|-----------------------------------------------|--------------------------------------------------------------------------------|--------------------------------------------------------------------------------|-----------------------------------------------------------------------------------------------------------------------------------------------------------------------------------------------------------------------------------------------------------------------------------------------------------------------------------------------------------------------------------------------------------------------------------------------------------|------------------------------------------------------------------------------------------------------------------------------------------------------------------------------------------------------------------------|------------------------------------------------------------------------------------------------------------------------------------------------------------------------------------------------------------------------------------------------------------------------------------------------------------------------------------------------------------------------------|
|                                          |                                               | No data on<br>NYHA Class                                                       | No data on<br>NYHA Class                                                       | Providers: Physician and advanced<br>nurse practitioner. Other<br>professionals participated as needed<br>– chaplains and social workers.                                                                                                                                                                                                                                                                                                                 | c. A "Do Not<br>Resuscitate"<br>order during<br>hospitalisation                                                                                                                                                        |                                                                                                                                                                                                                                                                                                                                                                              |
|                                          |                                               | Mean LVEF =<br>36.4% (16.7)                                                    | Mean LVEF =<br>38.1% (16.8)                                                    | <u>Usual Care</u><br>No information.                                                                                                                                                                                                                                                                                                                                                                                                                      | d. A "Do Not<br>Resuscitate"<br>order at home or<br>nursing home                                                                                                                                                       |                                                                                                                                                                                                                                                                                                                                                                              |
| <b>Rogers JG<br/>(2524) 2017<br/>USA</b> | Evaluation<br>phase RCT<br>with <80%<br>power | N = 75<br><br>Mean Age (SD)<br>= 71.9 (12.4)<br><br>Sex: M = 56.0;<br>F = 44.0 | N = 75<br><br>Mean Age (SD)<br>= 69.8 (13.4)<br><br>Sex: M = 49.3;<br>F = 50.7 | <u>Palliative Care in Heart Failure<br/>(PAL-HF)</u><br>Interdisciplinary, guideline-driven,<br>multicomponent palliative care<br>intervention in combination with<br>contemporary HF management,<br>including assessment and<br>management of physical symptoms,<br>psychosocial and spiritual concerns<br>and advance care planning<br><br>Providers: Palliative care nurse<br>practitioner, palliative medicine<br>board-certified physician, clinical | <u>a.1.</u> HF-specific quality<br>of life<br><u>b.2.</u> General and<br>palliative care<br>specific, health<br>related quality of<br>life<br><u>c.3.</u> Spiritual wellbeing<br><u>d.4.</u> Depression and<br>anxiety | 1. Greater improvements<br>in the HF-specific<br>quality of life (p = 0.03)<br>in PAL-HF arm<br>2. Greater improvement in<br>health related quality of<br>life in the intervention<br>arm (p = 0.035).<br>3. Spiritual wellbeing was<br>better improved in the<br>intervention arm (p =<br>0.027)<br>4. Depressive symptoms<br>improved more in the<br>intervention arm (p = |

Supplementary table 2: Characteristics of included studies

|                                                 |                                                                                          |                                                                                                 |                                                                                                 |                                                                                                                                                                                                                                                                                                                                                                                                                  |                                                    |                                                                                                                                                                   |
|-------------------------------------------------|------------------------------------------------------------------------------------------|-------------------------------------------------------------------------------------------------|-------------------------------------------------------------------------------------------------|------------------------------------------------------------------------------------------------------------------------------------------------------------------------------------------------------------------------------------------------------------------------------------------------------------------------------------------------------------------------------------------------------------------|----------------------------------------------------|-------------------------------------------------------------------------------------------------------------------------------------------------------------------|
|                                                 |                                                                                          | >55% = 21<br>(28.0%)<br>40-55% = 14<br>(18.7%)<br>25-40% = 17<br>(22.7%)<br><25 = 23<br>(30.7%) | >55% = 14<br>(18.7%)<br>40-55% = 19<br>(25.3%)<br>25-40% = 14<br>(18.7%)<br><25 = 28<br>(37.3%) | cardiology team, and when required, mental health provider.<br><br><u>Usual care</u><br><br>Inpatient care focused on symptom relief with outpatient follow up. They were not denied access to inpatient palliative care consultation.<br><br>Providers: Cardiologist directed team with HF expertise in inpatient setting. General practitioners , HF cardiologists, nurse practitioners in outpatient setting. |                                                    | 0.02), as well as anxiety (p = 0.048).                                                                                                                            |
| <b>Sahlen KG<br/>(2625)<br/>2015<br/>Sweden</b> | Evaluation phase RCT with 80% power<br><br>Community based with outpatient consultations | N = 36<br><br>Mean Age (SD) = 81.9 (7.2)<br><br>Sex: M = 72.2; F = 27.8                         | N = 36<br><br>Mean Age (SD) = 76.6 (10.2)<br><br>Sex: M = 69.4; F = 30.6                        | Note: Same study as Brännström <i>et al.</i> (3)<br><br><u>PREFER model</u><br>Person-centred care, total care including assessment of symptoms, quality of life, and risk, and registration into HF and palliative care registry.                                                                                                                                                                               | 1. Quality adjusted life years<br>2. Costs of care | 1. Small but significant difference in the weight of the quality adjusted life year (p = 0.026) favouring PREFER.<br>2. NSD in cost of care between the two arms. |



Supplementary table 2: Characteristics of included studies

|                                                  |                                                                                                                      |                                                                                 |                                                                                 |                                                                                                                                                                                                                                                                                                                               |                                                                                                                         |                                                                                                                                                                                                                                            |
|--------------------------------------------------|----------------------------------------------------------------------------------------------------------------------|---------------------------------------------------------------------------------|---------------------------------------------------------------------------------|-------------------------------------------------------------------------------------------------------------------------------------------------------------------------------------------------------------------------------------------------------------------------------------------------------------------------------|-------------------------------------------------------------------------------------------------------------------------|--------------------------------------------------------------------------------------------------------------------------------------------------------------------------------------------------------------------------------------------|
|                                                  |                                                                                                                      | No data on<br>NYHA Class or<br>LVEF                                             | No data on<br>NYHA Class or<br>LVEF                                             | Providers: Specialised nurses,<br>palliative care nurses, cardiologist,<br>palliative care physician,<br>physiotherapist, and occupational<br>therapist.<br><br><u>Usual care</u><br>No information.<br><br>Providers: General practitioners or<br>doctors and/ or the nurse-led heart<br>failure clinic.                     |                                                                                                                         |                                                                                                                                                                                                                                            |
| <b>Sidebottom<br/>AC (2726)<br/>2015<br/>USA</b> | Evaluation<br>phase RCT,<br>but poor<br>recruitment<br>resulted in<br>47.5% power<br><br>1 Inpatient<br>consultation | N = 116<br><br>Mean Age (SD)<br>= 76.0 (11.9)<br><br>Sex: M = 47.4;<br>F = 52.6 | N = 116<br><br>Mean Age (SD)<br>= 70.9 (13.6)<br><br>Sex: M = 57.8;<br>F = 42.2 | <u>Palliative care</u><br>Assessment of symptom burden,<br>emotional, spiritual and psychosocial<br>care, coordination of care orders,<br>recommendation for change in<br>current or future treatments.<br><br>Providers: 4 physicians board<br>certified in hospice and palliative<br>medicine, 2 clinical nurse specialists | 1. Symptom burden<br>2. Depression<br>3. Quality of life<br>4. Readmissions<br>5. Hospice use<br>6. ACP<br>7. Mortality | 1. Difference in symptom<br>burden favours<br>intervention in mean<br>change from baseline (p<br>< 0.001).<br>2. Difference in depression<br>favours intervention (p<br>< 0.001).<br>3. Improvement of quality<br>of life is better in the |

Supplementary table 2: Characteristics of included studies

|                                               |                                                   |                                                                                                                                                                                      |                                                                                                                                                                                       |                                                                                                                                                                                                                                                                                                                                                                                                                                 |                                                                                                                                            |                                                                                                                                                                                                                                                                                                                                |
|-----------------------------------------------|---------------------------------------------------|--------------------------------------------------------------------------------------------------------------------------------------------------------------------------------------|---------------------------------------------------------------------------------------------------------------------------------------------------------------------------------------|---------------------------------------------------------------------------------------------------------------------------------------------------------------------------------------------------------------------------------------------------------------------------------------------------------------------------------------------------------------------------------------------------------------------------------|--------------------------------------------------------------------------------------------------------------------------------------------|--------------------------------------------------------------------------------------------------------------------------------------------------------------------------------------------------------------------------------------------------------------------------------------------------------------------------------|
|                                               |                                                   | No data on<br>NYHA Class or<br>LVEF                                                                                                                                                  | No data on<br>NYHA Class or<br>LVEF                                                                                                                                                   | board certified in advanced practice<br>palliative care nursing, a social<br>worker and a chaplain.<br><br><u>Control group</u><br>No information.                                                                                                                                                                                                                                                                              |                                                                                                                                            | intervention arm ( $p < 0.001$ ).<br>4. NSD in readmissions<br>5. NSD in hospice use<br>between arms.<br>6. ACP process 2.87 times<br>more likely in<br>intervention.<br>7. NSD in mortality.                                                                                                                                  |
| <b>Wong FKY<br/>(2827)<br/>2016<br/>China</b> | Evaluation<br>phase RCT<br><br>Community<br>based | N = 43<br><br>Mean Age (SD)<br>= 78.3 (16.8)<br><br>Sex: M = 43.9;<br>F = 56.1<br><br>NYHA class II<br>= 6 (14.0%)<br>NYHA class III<br>= 31 (72.0%)<br>NYHA class IV<br>= 6 (14.0%) | N = 41<br><br>Mean Age (SD)<br>= 78.4 (10.0)<br><br>Sex: M = 61.0;<br>F = 39.0<br><br>NYHA class II<br>= 3 (7.3%)<br>NYHA class III<br>= 22 (53.7%)<br>NYHA class IV<br>= 16 (39.0 %) | <u>Transitional Care Palliative End-<br/>Stage Heart Failure</u><br>Pre-discharge assessment, patients'<br>needs assessment (environmental,<br>psychosocial, physiological and<br>health-related behaviour) and<br>intervention, goal setting and<br>creating a mutually agree care plan.<br><br>Providers: Nurse case managers<br>(primary provider), trained<br>volunteers, and nursing students.<br><br><u>Control group</u> | 1. Readmissions at 4<br>and 12 weeks<br>2. Symptom intensity<br>3. Functional status<br>4. Quality of life<br>5. Satisfaction with<br>care | 1. NSD in 4 week re-<br>admission rate, however<br>there was significantly<br>fewer 12 week re-<br>admissions in the<br>intervention arm ( $p = 0.001$ ).<br>2. NSD in symptom<br>burden across groups.<br>3. NSD in functional status<br>between or within<br>groups.<br>4. Both heart failure<br>specific ( $p = 0.01$ ) and |

Supplementary table 2: Characteristics of included studies

|                                          |                                                                 |                                                                                                                                     |                                                                                                                                     |                                                                                                                                                                                                                                                                           |                                                               |                                                                                                                                                                                                            |
|------------------------------------------|-----------------------------------------------------------------|-------------------------------------------------------------------------------------------------------------------------------------|-------------------------------------------------------------------------------------------------------------------------------------|---------------------------------------------------------------------------------------------------------------------------------------------------------------------------------------------------------------------------------------------------------------------------|---------------------------------------------------------------|------------------------------------------------------------------------------------------------------------------------------------------------------------------------------------------------------------|
|                                          |                                                                 | Mean LVEF = 39.0% (14.0)                                                                                                            | Mean LVEF = 37.0% (17.0)                                                                                                            | Usual care – palliative care medical clinic, discharge advice on symptom management and medication, and referrals if appropriate. Also, control group received 2 attention control social calls.                                                                          |                                                               | palliative care specific (p = 0.05) quality of life tools found significant improvement in the intervention arm.<br>5. The intervention group had significantly (p < 0.001) higher satisfaction with care. |
| <b>Paes P<br/>(2928)<br/>2005<br/>UK</b> | Feasibility and pilot phase RCT<br><br>Outpatient consultations | N = 6<br><br>Mean Age (SD) = 73.2 (4.2)<br><br>Sex: M = 100.0; F = 0.0<br><br>NYHA class III = 3 (50.0%)<br>NYHA class IV = 3 (50%) | N = 7<br><br>Mean Age (SD) = 78.0 (7.0)<br><br>Sex: M = 80.0; F = 20.0<br><br>NYHA class III = 3 (60.0%)<br>NYHA class IV = 2 (40%) | <u>Palliative care consultation</u><br>1 hour of palliative care medical outpatient consultation, followed by monthly 30-minute consultation for a total of 5 months.<br><br>Provider: Palliative care physician.<br><br><u>Control group</u><br>Regular cardiology care. | 1. Depression<br>2. Quality of life<br>3. Clinical evaluation | 1. NSD in depression between treatment arms.<br>2. NSD in quality of life between treatment arms.<br>3. The evaluation forms were positive and found the format acceptable.                                |

Supplementary table 2: Characteristics of included studies

|                         |                      | No data on<br>LVEF    | No data on<br>LVEF    |                                               |                             |                                 |
|-------------------------|----------------------|-----------------------|-----------------------|-----------------------------------------------|-----------------------------|---------------------------------|
| <b><u>O'Donnell</u></b> | <u>Pilot study</u>   | <u>N = 26</u>         | <u>N = 24</u>         | <u>Social Work (palliative care trained)</u>  |                             |                                 |
| <b><u>A (30)</u></b>    | <u>RCT</u>           | <u>Mean Age (SD)</u>  | <u>Mean Age (SD)</u>  | <u>consultation</u>                           |                             |                                 |
| <b><u>2018</u></b>      | <u>In-patient or</u> | <u>= 74.7 (11.2)</u>  | <u>= 69.2 (10.2)</u>  | <u>Conversation about goals of care and</u>   |                             |                                 |
| <b><u>USA</u></b>       | <u>community</u>     | <u>Sex: M 53.9, F</u> | <u>Sex: M = 62.5,</u> | <u>advanced care planning started in</u>      | <u>% patients with</u>      | <u>Higher % with ACP</u>        |
|                         | <u>consultations</u> | <u>= 46.1</u>         | <u>F = 37.5</u>       | <u>hospital and continued in the</u>          | <u>ACP documentation</u>    | <u>documentation in</u>         |
|                         |                      | <u>NYHA class 1</u>   | <u>NYHA class 1</u>   | <u>community post-discharge.</u>              | <u>and % aligned</u>        | <u>intervention arm (p =</u>    |
|                         |                      | <u>or 2 = 10</u>      | <u>or 2 = 8</u>       | <u>Palliative physician assessment and</u>    | <u>preferences at 6</u>     | <u>0.02), and better</u>        |
|                         |                      | <u>(38.5%)</u>        | <u>(33.3%)</u>        | <u>management plan including</u>              | <u>months</u>               | <u>alignment with</u>           |
|                         |                      | <u>NYHA class 3</u>   | <u>NYHA class 3</u>   | <u>outpatient palliative medicine</u>         | <u>FACIT-Sp</u>             | <u>physician assessed</u>       |
|                         |                      | <u>or 4 = 16</u>      | <u>or 4 = 16</u>      | <u>consults as needed</u>                     | <u>Patient and provider</u> | <u>prognosis in</u>             |
|                         |                      | <u>(61.5%)</u>        | <u>(66.7%)</u>        | <u>Provider: Palliative social worker</u>     | <u>preferences of care</u>  | <u>intervention arm (p</u>      |
|                         |                      | <u>Mean LVEF =</u>    | <u>Mean LVEF =</u>    | <u>and palliative physician</u>               | <u>questionnaire</u>        | <u>&lt;0.001)</u>               |
|                         |                      | <u>30% (14)</u>       | <u>36% (17)</u>       | <u>Control: Usual care, includes</u>          | <u>KCCQ-12</u>              | <u>NSD in any other outcome</u> |
|                         |                      |                       |                       | <u>available information about palliative</u> | <u>EQ-5D VAS</u>            | <u>measure.</u>                 |
|                         |                      |                       |                       | <u>care and advance care planning, and</u>    | <u>PHQ-8</u>                |                                 |
|                         |                      |                       |                       | <u>access to in-patient palliative care</u>   | <u>7. GAD-7</u>             |                                 |
|                         |                      |                       |                       | <u>team if needed. NB. Out patient</u>        |                             |                                 |
|                         |                      |                       |                       | <u>palliative care consults NOT part of</u>   |                             |                                 |
|                         |                      |                       |                       | <u>usual care.</u>                            |                             |                                 |

Supplementary table 2: Characteristics of included studies

|                                                                                          |                                                                    |                                                                                                                                                                                                                                                                                                                     |                                                                                                                                                                                                                                                                                                      |                                                                                                                                                                                                                                                                                                                                                                                                                                                                                                                                    |                                                                                                                                                                                                                                                                                                                                                                         |                                                                                                                                                                                                                                                                                                                                                                                                                                                                                                                                                                                                                                                       |
|------------------------------------------------------------------------------------------|--------------------------------------------------------------------|---------------------------------------------------------------------------------------------------------------------------------------------------------------------------------------------------------------------------------------------------------------------------------------------------------------------|------------------------------------------------------------------------------------------------------------------------------------------------------------------------------------------------------------------------------------------------------------------------------------------------------|------------------------------------------------------------------------------------------------------------------------------------------------------------------------------------------------------------------------------------------------------------------------------------------------------------------------------------------------------------------------------------------------------------------------------------------------------------------------------------------------------------------------------------|-------------------------------------------------------------------------------------------------------------------------------------------------------------------------------------------------------------------------------------------------------------------------------------------------------------------------------------------------------------------------|-------------------------------------------------------------------------------------------------------------------------------------------------------------------------------------------------------------------------------------------------------------------------------------------------------------------------------------------------------------------------------------------------------------------------------------------------------------------------------------------------------------------------------------------------------------------------------------------------------------------------------------------------------|
| <b><u>Johnson</u></b><br><b><u>MJ (31)</u></b><br><b><u>2018</u></b><br><b><u>UK</u></b> | <u>Out-patient or</u><br><u>home-based</u><br><u>interventions</u> | <u>Cohort 1:</u><br><u>palliative</u><br><u>cardiology</u><br><u>N = 43</u><br><u>Mean Age (SD)</u><br><u>= 75.8 (12.3)</u><br><u>Sex: M 55.8, F</u><br><u>= 44.2</u><br><u>NYHA: class I</u><br><u>= 0</u><br><u>class II = 0</u><br><u>class III = 40</u><br><u>(93.0)</u><br><u>class IV = 3</u><br><u>(7.0)</u> | <u>Cohort 2: usual</u><br><u>care</u><br><u>N = 34</u><br><u>Mean Age (SD)</u><br><u>= 78.4 (11.3)</u><br><u>Sex: M 50.0, F</u><br><u>= 50.0</u><br><u>NYHA: class I</u><br><u>= 0</u><br><u>class II = 3 (8.8)</u><br><u>class III = 30</u><br><u>(88.2)</u><br><u>class IV = 1</u><br><u>(2.9)</u> | <u>Cohort 1. Palliative cardiology clinic</u><br><u>consultations with a cardiologist and</u><br><u>heart failure nurse consultant with a</u><br><u>special interest in palliative care. Full</u><br><u>holistic assessment, medication</u><br><u>review, advance care planning,</u><br><u>symptom management, care co-</u><br><u>ordination, and community based</u><br><u>follow up with liaison with primary</u><br><u>care. Referrals to other services</u><br><u>including specialist palliative care as</u><br><u>needed</u> | <u>Feasibility measures</u><br><u>(recruitment,</u><br><u>attrition, data</u><br><u>quality, sample size</u><br><u>calculation for trial)</u><br><u>AKPS</u><br><u>ESAS</u><br><u>KCCQ-12</u><br><u>HADs</u><br><u>EQ-5L-5D</u><br><u>Health service</u><br><u>utilisation</u><br><u>Patient</u><br><u>understanding</u><br><u>ACP documentation</u><br><u>Survival</u> | <u>Groups imbalanced; Cohort</u><br><u>1 less well, more</u><br><u>symptomatic and worse QoL</u><br><u>Concluded a future trial</u><br><u>was feasibility and</u><br><u>sample size for KCCQ-</u><br><u>12 as primary outcome</u><br><u>calculated</u><br><u>NSD AKPS</u><br><u>Greater improvement in</u><br><u>usual care (p = 0.046)</u><br><u>NSD KCCQ-12</u><br><u>NSD HADs</u><br><u>NSD EQ-5D-5L</u><br><u>Fewer nights in hospital</u><br><u>but more GP visits in</u><br><u>cohort 1. Average costs</u><br><u>reduced by £785 per</u><br><u>patient.</u><br><u>Better patient</u><br><u>understanding in Cohort</u><br><u>1 (p&lt;0.001)</u> |
|                                                                                          |                                                                    |                                                                                                                                                                                                                                                                                                                     |                                                                                                                                                                                                                                                                                                      | <u>Cohort 2. Usual care. Case-based</u><br><u>care from heart failure nurse</u><br><u>specialist in community care, with</u><br><u>access to hospital-based cardiology</u><br><u>physicians as needed. Specialist</u><br><u>palliative care available if referred.</u>                                                                                                                                                                                                                                                             |                                                                                                                                                                                                                                                                                                                                                                         |                                                                                                                                                                                                                                                                                                                                                                                                                                                                                                                                                                                                                                                       |

Supplementary table 2: Characteristics of included studies

|                                  |                                                                                                   |                                                                                                                                                                                                                                                          |                                                                                                                                                                                                                                                                                                                                                                                                                           |                                                                                                                                                                                                                                                                                                                                                                                                         |                                                                                                                                                                                                                                                                                                                                                                                                                              |
|----------------------------------|---------------------------------------------------------------------------------------------------|----------------------------------------------------------------------------------------------------------------------------------------------------------------------------------------------------------------------------------------------------------|---------------------------------------------------------------------------------------------------------------------------------------------------------------------------------------------------------------------------------------------------------------------------------------------------------------------------------------------------------------------------------------------------------------------------|---------------------------------------------------------------------------------------------------------------------------------------------------------------------------------------------------------------------------------------------------------------------------------------------------------------------------------------------------------------------------------------------------------|------------------------------------------------------------------------------------------------------------------------------------------------------------------------------------------------------------------------------------------------------------------------------------------------------------------------------------------------------------------------------------------------------------------------------|
|                                  |                                                                                                   |                                                                                                                                                                                                                                                          |                                                                                                                                                                                                                                                                                                                                                                                                                           |                                                                                                                                                                                                                                                                                                                                                                                                         | <a href="#">More ACP documentation in Cohort 1 (p&lt;0.001) NSD in survival</a>                                                                                                                                                                                                                                                                                                                                              |
| <b>Bakitas M (3029) 2017 USA</b> | Single-arm feasibility and pilot phase trial<br><br>Community based with outpatient consultations | N = 61<br><br>Mean Age (SD) = 70.59 (10.7)<br><br>Sex: M = 50.8; F = 49.2<br><br>NYHA class I = 1 (1.6%)<br>NYHA class II = 3 (4.9%)<br>NYHA class III = 43 (70.5%)<br>NYHA class IV = 12 (19.7%)<br>Unknown = 2 (3.3%)<br><br>Mean LVEF = 37.86% (16.3) | <u>Educate, Nurture, Advise, Before Life Ends Comprehensive Heartcare for Patients and Caregivers (ENABLE CHF-PC)</u><br><br>A telephonic early palliative care intervention for rural-dwelling, underserved HF patient and caregivers including in-person palliative care consultation, weekly semi-structured telephone palliative care nurse coaching, and monthly follow-ups.<br><br>Providers: Trained nurse coaches | 1. Feasibility and acceptability<br>2. Patient reported outcomes <ul style="list-style-type: none"><li>•a. Disease specific quality of life</li><li>•b. Symptom burden</li><li>•c. Anxiety and depression</li><li>•d. General wellbeing</li><li>•e. Assessment of chronic illness care</li></ul> 3. Caregiver reported outcomes <ul style="list-style-type: none"><li>•a. Caregiving outcomes</li></ul> | 1. Results discussed in paper – not relevant to the review.<br>2. Patient reported outcomes <ul style="list-style-type: none"><li>a. Significant improvement in KCCQ clinical summary (p = 0.009)</li><li>b. Significant reduction in symptom burden (p = 0.0004)</li><li>c. NSD in anxiety or depression</li><li>d. NSD in physical health, however there was significant improvement in the global mental health</li></ul> |

Supplementary table 2: Characteristics of included studies

|  |  |  |  |                                          |                                                                                |
|--|--|--|--|------------------------------------------|--------------------------------------------------------------------------------|
|  |  |  |  | measuring life changes                   | T score of PROMIS (p = 0.04)                                                   |
|  |  |  |  | •b. Anxiety and depression               | e. NSD in PACIC summary score.                                                 |
|  |  |  |  | •c. General wellbeing                    | 3. Caregiver reported outcomes                                                 |
|  |  |  |  | •d. Caregiver burden                     | a. NSD in caregiving outcomes.                                                 |
|  |  |  |  | •e. Positive aspects of caregiving       | b. NSD in anxiety or depression.                                               |
|  |  |  |  | 4. Resource use                          | c. NSD in the carer's general wellbeing.                                       |
|  |  |  |  | •a. Number of days in hospital per month | d. Significant reduction in burden on the carer (p = 0.002)                    |
|  |  |  |  | •b. Number of days in ICU per month      | e. NSD in the positive aspects of caregiving.                                  |
|  |  |  |  | •c. Number of visits to ED per month     | 4. Resource use                                                                |
|  |  |  |  | •d. Hospice use                          | 1.a. Significant reduction in number of days in hospital per month (p = 0.002) |

Supplementary table 2: Characteristics of included studies

|                                    |                                                  |                                                                                                           |                                                                                                          |                                                                                                                                                                                                                                                                                                                                    |                                                                                             |                                                                                                                                                                                                                                                                                              |
|------------------------------------|--------------------------------------------------|-----------------------------------------------------------------------------------------------------------|----------------------------------------------------------------------------------------------------------|------------------------------------------------------------------------------------------------------------------------------------------------------------------------------------------------------------------------------------------------------------------------------------------------------------------------------------|---------------------------------------------------------------------------------------------|----------------------------------------------------------------------------------------------------------------------------------------------------------------------------------------------------------------------------------------------------------------------------------------------|
|                                    |                                                  |                                                                                                           |                                                                                                          |                                                                                                                                                                                                                                                                                                                                    |                                                                                             | <a href="#">2.b.</a> NSD in number of days in ICU per month<br><a href="#">3.c.</a> NSD in number of visits to ED per month<br><a href="#">4.d.</a> NSD in hospice use.                                                                                                                      |
| <b>Tadwalkar R (3132) 2014 USA</b> | Quasi-experimental trial<br><br>Inpatient visits | N = 14<br><br>Mean Age (SD) = 58 (11)<br><br>Sex: M = 42.9; F = 57.1<br><br>No data on NYHA Class or LVEF | N = 9<br><br>Mean Age (SD) = 57 (10)<br><br>Sex: M = 55.6; F = 44.4<br><br>No data on NYHA Class or LVEF | <u>Religious support</u><br>Prayer, reading of religious text, religion-specific rituals, and other pastoral care.<br><br>Provider: member of the chaplaincy.<br><br><u>Non-religious support</u><br>Personal discussions, recreational activities, undertaking social and spiritual support.<br><br>Provider: in-house volunteer. | 1. Depression<br>2. Spirituality<br>3. Symptom burden<br>4. Enjoyment and life satisfaction | 1. Significant reduction in depression over time but there was NSD between the two groups.<br>2. NSD in spirituality between the two groups or over time.<br>3. NSD in symptom burden between groups or over time.<br>4. NSD in enjoyment and life satisfaction between groups or over time. |
| Observational studies              |                                                  |                                                                                                           |                                                                                                          |                                                                                                                                                                                                                                                                                                                                    |                                                                                             |                                                                                                                                                                                                                                                                                              |



Supplementary table 2: Characteristics of included studies

|                                                                          |                                                       |                                                                                                                                     |                                                                                                                                      |                                                                                                     |                                                                             |                                                                                        |
|--------------------------------------------------------------------------|-------------------------------------------------------|-------------------------------------------------------------------------------------------------------------------------------------|--------------------------------------------------------------------------------------------------------------------------------------|-----------------------------------------------------------------------------------------------------|-----------------------------------------------------------------------------|----------------------------------------------------------------------------------------|
| <p><b>Connor SR</b><br/><b>(3233)</b><br/><b>2007</b><br/><b>USA</b></p> | <p>Retrospective Cohort Study</p> <p>Hospice care</p> | <p>N = 2095<br/>(patients with CHF = 83)</p> <p>Mean Age = 73.5</p> <p>Sex: M = 55; F = 45</p> <p>No data on NYHA Class or LVEF</p> | <p>N = 2260<br/>(patients with CHF = 457)</p> <p>Mean Age = 73.9</p> <p>Sex: M = 59; F = 41</p> <p>No data on NYHA Class or LVEF</p> | <p><u>Intervention</u><br/>Hospice care</p> <p><u>Comparator</u><br/>No claims for hospice care</p> | <p>3a-1. Survival</p>                                                       | <p>1. Increase in survival period in those who received hospice care (p = 0.0540).</p> |
| <p><b>Enguidanos SM</b><br/><b>(3334)</b></p>                            | <p>Prospective Cohort Study</p>                       | <p>Note: Mixed population study with subset analysis of CHF patients</p>                                                            | <p><u>Kaiser Permanente Home-based Palliative Care Program</u><br/>Extensive patient and family</p>                                  |                                                                                                     | <p>1. Severity of illness</p> <p>2. Service use</p> <p>3. Site of death</p> | <p>1. Intervention group had significantly (p &lt; 0.001) more severe illness at</p>   |

Supplementary table 2: Characteristics of included studies

|                                         |                                               |                                                                                                                                           |                                                                                                                                           |                                                                                                                                                                                                                                                                                                                                                                                                                                                                                                                  |                                                                  |                                                                                                                                                                                                                                                                                                                                                    |
|-----------------------------------------|-----------------------------------------------|-------------------------------------------------------------------------------------------------------------------------------------------|-------------------------------------------------------------------------------------------------------------------------------------------|------------------------------------------------------------------------------------------------------------------------------------------------------------------------------------------------------------------------------------------------------------------------------------------------------------------------------------------------------------------------------------------------------------------------------------------------------------------------------------------------------------------|------------------------------------------------------------------|----------------------------------------------------------------------------------------------------------------------------------------------------------------------------------------------------------------------------------------------------------------------------------------------------------------------------------------------------|
| <b>2005<br/>USA</b>                     | Community based with outpatient consultations | N = 159<br>(patients with CHF = 31)<br><br>Mean Age (SD) = 70 (13.92)<br><br>Sex: M = 49.1; F = 50.9<br><br>No data on NYHA Class or LVEF | N = 139<br>(patients with CHF = 51)<br><br>Mean Age (SD) = 73 (13.29)<br><br>Sex: M = 44.6; F = 55.4<br><br>No data on NYHA Class or LVEF | education on the disease/ condition; training in symptom control; psychosocial support aimed at assisting in making care choices in advance.<br><br>Providers: Physicians, nurses, social workers, and other health care professionals.<br><br><u>Usual Care</u><br>Standard Kaiser Permanente TriCentral Service Area care.<br>Standard health care in response to needs and home care only when Medicare certified criteria are fulfilled. Access to psychosocial support and social services is very limited. | 4. Days on service<br>5. Costs of care                           | enrolment. $\diamond$<br>2. NSD in obtaining hospice care between groups. $\diamond$<br>3. Palliative care arm were significantly more likely to die at home ( $p < 0.001$ ).<br>4. Significantly fewer days on service ( $p < 0.001$ ) in the intervention arm.<br>5. Palliative care group on average cost less than those in the control group. |
| <b>Pattenden<br/>JF (3435)<br/>2013</b> | Prospective Cohort Study                      | N = 99<br><br>Mean Age (SD) = 81.7                                                                                                        | N = 98<br><br>Mean Age (SD) = 78.85                                                                                                       | <u>Better Together Intervention</u><br>Self-management education and advice to patients and their carers, clinical assessment and regular                                                                                                                                                                                                                                                                                                                                                                        | 1. Resource use – admissions, length of stay<br>2. Costs of care | 1. Smaller proportion of patients in the intervention group in Bradford was admitted                                                                                                                                                                                                                                                               |

Supplementary table 2: Characteristics of included studies

|                                                    |                                                                     |                                                                 |                                                                 |                                                                                                                                                                                                                                                                                                                                                                                                                           |                                                                                 |                                                                                                                                                                                                                                                                                                                                                          |
|----------------------------------------------------|---------------------------------------------------------------------|-----------------------------------------------------------------|-----------------------------------------------------------------|---------------------------------------------------------------------------------------------------------------------------------------------------------------------------------------------------------------------------------------------------------------------------------------------------------------------------------------------------------------------------------------------------------------------------|---------------------------------------------------------------------------------|----------------------------------------------------------------------------------------------------------------------------------------------------------------------------------------------------------------------------------------------------------------------------------------------------------------------------------------------------------|
| <b>UK</b>                                          | Community based                                                     | Sex: M = 60.6;<br>F = 39.4<br><br>No data on NYHA Class or LVEF | Sex: M = 62.0;<br>F = 37.8<br><br>No data on NYHA Class or LVEF | monitoring and review, palliative nursing e.g. medication for symptoms and psychological support, respite care.<br><br>Providers: British Heart Failure (BHF) Heart Failure Specialist Nurses (HFSN); Marie Curie Cancer Care Nurses (MCN), Marie Curie Cancer Care Healthcare Assistants (MCHCAs); district nurses and other support services.<br><br><u>Control patients</u><br>'Convenience sample' historical sample. | 3. Benefits of care – death in preferred place of care<br>4. Cost-effectiveness | to hospital ( $p < 0.01$ ), and fewer admissions per patient in the intervention arm in Poole ( $p < 0.05$ ). NSD in LOS.<br>2. Fewer costs of care in the intervention in both sites (significant in Bradford).<br>3. Significantly different distribution of place of death ( $p < 0.0001$ ).<br>4. Uncertainty around incremental cost-effectiveness. |
| <b>Evangelista<br/>LS† (3536)<br/>2014<br/>USA</b> | Prospective Single-arm Cohort Study<br><br>Outpatient consultations | N = 29<br><br>Mean Age (SD) = 53.3 (7.3)                        | N = 13<br><br>Mean Age (SD) = 52.5 (7.6)                        | <u>Palliative Care</u><br>Intake summary with current health status and treatment regimen, assessment of physical and psychological symptoms, determine illness understanding, establish goals                                                                                                                                                                                                                            | 1. Perceived control<br>2. Patient activation<br>3. Symptom distress            | 1. Greater improvement in perceived control ( $p < 0.001$ ).<br>2. Greater improvement in activation ( $p < 0.001$ ).                                                                                                                                                                                                                                    |

Supplementary table 2: Characteristics of included studies

|                                                    |                                                                              |                                                                            |                                                                           |                                                                                                                                                                                                  |                                                                                |                                                                                                                                                                 |
|----------------------------------------------------|------------------------------------------------------------------------------|----------------------------------------------------------------------------|---------------------------------------------------------------------------|--------------------------------------------------------------------------------------------------------------------------------------------------------------------------------------------------|--------------------------------------------------------------------------------|-----------------------------------------------------------------------------------------------------------------------------------------------------------------|
|                                                    |                                                                              | Sex: M = 75.9;<br>F = 24.1                                                 | Sex: M = 61.5;<br>F = 38.5                                                | of care, assist with treatment decision making and coordination of care.                                                                                                                         |                                                                                | 3. Greater reduction in symptom distress (p < 0.001).                                                                                                           |
|                                                    |                                                                              | NYHA class II = 20 (69.0%)<br>NYHA class III = 9 (31.0%)                   | NYHA class II = 9 (69.2%)<br>NYHA class III = 4 (30.8%)                   | Providers: Palliative care specialist (e.g. physician or advance practice nurse).                                                                                                                |                                                                                |                                                                                                                                                                 |
|                                                    |                                                                              | Mean LVEF = 23.1% (4.3)                                                    | Mean LVEF = 30.5% (9.7)                                                   | <u>'Intervention group'</u><br>Participants receiving > 2 palliative care consultations.                                                                                                         |                                                                                |                                                                                                                                                                 |
|                                                    |                                                                              |                                                                            |                                                                           | <u>'Comparator group'</u><br>Participants receiving ≤ 1 palliative care consultations.                                                                                                           |                                                                                |                                                                                                                                                                 |
| <b>Evangelista<br/>LS* (3637)<br/>2014<br/>USA</b> | Prospective<br>Single-arm<br>Cohort Study<br><br>Outpatient<br>consultations | N = 29<br><br>Mean Age (SD) = 54.1 (8.4)<br><br>Sex: M = 75.9;<br>F = 24.1 | N = 7<br><br>Mean Age (SD) = 52.7 (6.3)<br><br>Sex: M = 57.1;<br>F = 42.9 | <u>Palliative Care</u><br>Comprehensive physical and psychosocial assessment, discussions about advance care planning, developed a treatment plan (with participants) and listing goals of care. | 1. Symptom rating<br>2. Type of palliative care, focus of care, medication use | 1. Improvement in symptom burden in those who were followed up (p < 0.001).<br>2. Patients who chose to have additional palliative care input were referred to: |

Supplementary table 2: Characteristics of included studies

|                                    |                                                                           |                                                                                                           |                                                                                                                                                                                                                                                  |                                                                                                                                                                                                                                                                                                |                                                                                                                                                                                                                                                                                                             |
|------------------------------------|---------------------------------------------------------------------------|-----------------------------------------------------------------------------------------------------------|--------------------------------------------------------------------------------------------------------------------------------------------------------------------------------------------------------------------------------------------------|------------------------------------------------------------------------------------------------------------------------------------------------------------------------------------------------------------------------------------------------------------------------------------------------|-------------------------------------------------------------------------------------------------------------------------------------------------------------------------------------------------------------------------------------------------------------------------------------------------------------|
|                                    |                                                                           | NYHA class II<br>= 20 (69.0%)<br><br>NYHA class III<br>= 9 (31.0%)<br><br>Mean LVEF =<br>25.9% (5.3)      | NYHA class II<br>= 5 (71.4%)<br><br>NYHA class III<br>= 2 (28.6%)<br><br>Mean LVEF =<br>23.1% (4.3)                                                                                                                                              | Providers: Palliative care specialist<br>(e.g. physician or advance practice<br>nurse).<br><br>'Intervention group'<br>Participants receiving palliative care<br>consultation and follow up.<br><br>'Comparator group'<br>Participants receiving initial<br>palliative care consultation only. | a. Pharmacist for new<br>medication (69%)<br>or changes to their<br>medication (24%)<br>b. social work support<br>(69%)<br>c. physical and<br>occupational<br>therapists (66%)<br>d. psychiatrists (55%)<br>e. chaplain (45%)<br>f. home health (83%)<br>g. support groups<br>(31%) and<br>h. hospice (7%). |
| Taylor GJ<br>(3738)<br>2017<br>USA | Retrospective<br>Single-arm<br>Cohort Study<br><br><br>Community<br>based | N = 32<br><br>Age Range (Median) = 48-94 (70)<br><br>Sex: M = 100; F = 0<br><br>NYHA class III = 2 (6.7%) | Intervention<br>Home-delivered palliative care with<br>intensive guidelines-directed medical<br>therapy using the standard hospice<br>approach to psychosocial and<br>spiritual aspects of end-of-life care,<br>optimising the drug therapy, and | 1. Re-hospitalisations<br>2. Death at home<br>3. NYHA functional<br>class<br>4. BNP levels                                                                                                                                                                                                     | 1. Drop in hospital<br>admissions from 110<br>admissions in the 6<br>months prior to<br>enrolment to 26<br>admissions after<br>enrolment.                                                                                                                                                                   |

Supplementary table 2: Characteristics of included studies

|                                                  |                                                                      |                                                                                                                                                             |                                                                                                                                                                                                                                                                                            |                                                                           |                                                                                                                                                                                                                            |
|--------------------------------------------------|----------------------------------------------------------------------|-------------------------------------------------------------------------------------------------------------------------------------------------------------|--------------------------------------------------------------------------------------------------------------------------------------------------------------------------------------------------------------------------------------------------------------------------------------------|---------------------------------------------------------------------------|----------------------------------------------------------------------------------------------------------------------------------------------------------------------------------------------------------------------------|
|                                                  |                                                                      | NYHA class IV = 28 (93.3%)<br><br>No specific data on LVEF, but 23 patients had HFrEF (LVEF <30%) and 7 had HFpEF.                                          | laboratory evaluation when clinically indicated.<br><br>Providers: Home-hospice nurses, cardiologists, social workers, chaplains, and volunteers.<br><br>No control                                                                                                                        |                                                                           | 2. 18 out of the 21 patients who died, did so at home.<br>3. Improvement in pre-post NYHA class IV versus NYHA class III ( $p < 0.001$ ).<br>4. Improvement in BNP levels following treatment with L-dopa ( $p = 0.014$ ). |
| <b>Wong RC<br/>(3839)<br/>2013<br/>Singapore</b> | Prospective<br>Single-arm<br><br>Cohort Study<br><br>Community based | N = 44<br><br>Mean Age (SD) = 79 (9)<br><br>Sex: M = 38.6; F = 61.4<br><br>NYHA class III = 31 (70.0%)<br>NYHA class IV = 13 (30.0%)<br><br>No data on LVEF | <u>Home Palliative Care Program</u><br>Measure patient's physiological parameters, physical examination to elicit relevant signs and symptoms, medication modification or initiation to palliate patient's symptoms.<br><br>Providers: Doctor, nurse and/ or counsellor.<br><br>No control | 1. HF hospitalisation<br>2. All cause hospitalisation<br>3. Time to death | 1. Mean HF hospitalisation improved from baseline ( $p < 0.0001$ ).<br>2. Mean all-cause hospitalisation improved from baseline ( $p < 0.0001$ ).<br>3. Mean time to death was 5.5 months.                                 |

Supplementary table 2: Characteristics of included studies

|                                    |                                        |                                                                                |                                                                                |                                                                                                                                                                                                                                                                |                                                                                                                                                                                                                                                                                                                                                                                                 |                                                                                                                                                                                                                                                                                                                                                                                                                                                                                                                                                                                       |
|------------------------------------|----------------------------------------|--------------------------------------------------------------------------------|--------------------------------------------------------------------------------|----------------------------------------------------------------------------------------------------------------------------------------------------------------------------------------------------------------------------------------------------------------|-------------------------------------------------------------------------------------------------------------------------------------------------------------------------------------------------------------------------------------------------------------------------------------------------------------------------------------------------------------------------------------------------|---------------------------------------------------------------------------------------------------------------------------------------------------------------------------------------------------------------------------------------------------------------------------------------------------------------------------------------------------------------------------------------------------------------------------------------------------------------------------------------------------------------------------------------------------------------------------------------|
| Cassel JB<br>(3940)<br>2016<br>USA | Retrospective<br>Case-Control<br>Study | N = 174<br><br>Mean Age (SD)<br>= 87.5 (6.6)<br><br>Sex: M = 44.3;<br>F = 55.7 | N = 499<br><br>Mean Age (SD)<br>= 87.1 (6.4)<br><br>Sex: M = 43.7;<br>F = 56.3 | Transitions<br>Concurrent care home-based<br>program including in home medical<br>consultation, ongoing<br>prognostication, caregiver support,<br>advance healthcare planning,<br>symptom management, education,<br>and psychosocial and spiritual<br>support. | 1. Costs:<br>a. Costs per month<br>for hospital care<br>b. Costs per month<br>for other care<br>c. All costs per<br>month<br>2. Hospitalisation<br>a. Percentage<br>hospitalised at<br>least once<br>b. Number of<br>hospitalisations<br>per month<br>c. Number of<br>hospital days per<br>month<br>d. 30-day<br>readmission rate<br>e. ICU stay during<br>admission within<br>30 days of death | 1. Improvement in costs<br>per month for hospital<br>care ( $p < 0.001$ ) and all<br>costs per month ( $p < 0.001$ ) in the Transitions<br>participants. NSD in<br>costs per month for<br>other care.<br>2. Lower percentage of<br>patients hospitalised at<br>least once, fewer<br>number of<br>hospitalisations per<br>month, fewer number of<br>hospital days per month,<br>lower rate of 30-day<br>readmission and lower<br>rate of ICU stay prior to<br>death ( $p < 0.001$ ) in the<br>intervention arm.<br>3. Lower percentage of<br>patients from the<br>Transitions arm were |
|                                    | Community<br>based                     | No data on<br>NYHA Class or<br>LVEF                                            | No data on<br>NYHA Class or<br>LVEF                                            | Providers: Doctors, nurses, spiritual<br>care providers, and social workers.<br><br><u>Comparator</u><br>No information.                                                                                                                                       |                                                                                                                                                                                                                                                                                                                                                                                                 |                                                                                                                                                                                                                                                                                                                                                                                                                                                                                                                                                                                       |

Supplementary table 2: Characteristics of included studies

|                                       |                                                                 |                                                                                                                                                                         |                                                                                                                                                                         |                                                                                                                                                                                                                                                                                                                                                                    |                                                            |                                                                                                                                                                                                         |
|---------------------------------------|-----------------------------------------------------------------|-------------------------------------------------------------------------------------------------------------------------------------------------------------------------|-------------------------------------------------------------------------------------------------------------------------------------------------------------------------|--------------------------------------------------------------------------------------------------------------------------------------------------------------------------------------------------------------------------------------------------------------------------------------------------------------------------------------------------------------------|------------------------------------------------------------|---------------------------------------------------------------------------------------------------------------------------------------------------------------------------------------------------------|
|                                       |                                                                 |                                                                                                                                                                         |                                                                                                                                                                         |                                                                                                                                                                                                                                                                                                                                                                    | 3. Admission within 30 days of death and death in hospital | admitted within 30 days of death and dying in hospital (P <0.001)                                                                                                                                       |
| <b>Evangelista LS (4041) 2012 USA</b> | Prospective Case-Control Study<br><br>1 Outpatient consultation | N = 36<br><br>Mean Age (SD) = 53.9 (8.0)<br><br>Sex: M = 72.2; F = 27.8<br><br>NYHA class II = 25 (69.4%)<br>NYHA class III = 11 (30.6%)<br><br>Mean LVEF = 25.4% (5.2) | N = 36<br><br>Mean Age (SD) = 53.3 (8.7)<br><br>Sex: M = 69.4; F = 30.6<br><br>NYHA class II = 26 (72.2%)<br>NYHA class III = 10 (27.8%)<br><br>Mean LVEF = 26.0% (6.2) | <u>Palliative care consultation</u><br>Assessment of current medical status and screening intake, evaluation of patient's goals and preferences, assessment of areas of perceived needs and establish a treatment plan with co-ordination of care.<br><br>Providers: Palliative care physician or advance practice nurse.<br><br><u>Control</u><br>No information. | 1. Symptom burden<br>2. Depression<br>3. Quality of life   | 1. Lower symptom burden following intervention (p = 0.031).<br>2. Lower depression following intervention (p = 0.034).<br>3. Quality of life significantly improved following intervention (p = 0.015). |
| <b>Blecker S (4142) 2011</b>          | Cross-Sectional Study                                           | N = 6,436<br><br>Mean Age (SD) = 85.0 (7.6)                                                                                                                             | N = 10,177<br><br>Mean Age (SD) = 83.6 (7.9)                                                                                                                            | <u>Intervention</u><br>Hospice care<br><br><u>Comparator</u>                                                                                                                                                                                                                                                                                                       | Costs<br>Resource use – hospitalisations, ICU admission,   | Higher total adjusted expenditures in hospice care.                                                                                                                                                     |



Supplementary table 2: Characteristics of included studies

|     |              |                            |                            |                            |                                       |                                                                                                                                                                              |
|-----|--------------|----------------------------|----------------------------|----------------------------|---------------------------------------|------------------------------------------------------------------------------------------------------------------------------------------------------------------------------|
| USA | Hospice Care | Sex: M = 39.5;<br>F = 60.5 | Sex: M = 44.5;<br>F = 55.5 | No claims for hospice care | length of stay in<br>hospital and ICU | Hospice care patients<br>were less likely to be<br>admitted to hospital or<br>have ICU stay during<br>this time, and spent<br>significantly less time in<br>hospital or ICU. |
|     |              | No data on                 | No data on                 |                            |                                       |                                                                                                                                                                              |
|     |              | NYHA Class or              | NYHA Class or              |                            |                                       |                                                                                                                                                                              |
|     |              | LVEF                       | LVEF                       |                            |                                       |                                                                                                                                                                              |

*Note: Evangelista LS 2014† is titled: On-going palliative care enhances perceived control and patient activation and reduces symptom distress in patients with symptomatic heart failure: A pilot study and Evangelista LS 2014\* is titled: Does the Type and Frequency of Palliative Care Services Received by Patients with Advanced Heart Failure Impact Symptom Burden?*

◇ is used where there is no subset analysis of CHF population in mixed population studies.

*Abbreviations: NYHA = New York Heart Association; LVEF = Left Ventricular Ejection Fraction; RCT = Randomised Controlled Trial; CHF = Congestive Heart Failure; SD = Standard Deviation; HF = Heart Failure; KCCQ = Kansas City Cardiomyopathy Questionnaire; PHQ-9 = Patient Health Questionnaire-9; ACP = Advance Care Planning; NSD = no significant difference; LOS = length of stay.*

Supplementary table 3: Breakdown of palliative care components delivered in the included studies

| Study                  | Components of palliative care | Assessment of current status | Assessment of need | Assessment of quality of life | Symptom management | Psychological support | Social support | Spiritual support | Medication review and monitoring | Tele-health and monitoring | Patient education | Goal setting | Advance care planning | Coordination of care | Multidisciplinary involvement | Carer/ family support |
|------------------------|-------------------------------|------------------------------|--------------------|-------------------------------|--------------------|-----------------------|----------------|-------------------|----------------------------------|----------------------------|-------------------|--------------|-----------------------|----------------------|-------------------------------|-----------------------|
| Aiken LS (240)         |                               | ✓                            | ✓                  |                               | ✓                  | ✓                     | ✓              |                   | ✓                                |                            | ✓                 |              | ✓                     | ✓                    | ✓                             | ✓                     |
| Bekelman DB (2221)     |                               | ✓                            | ✓                  | ✓                             | ✓                  | ✓                     |                |                   | ✓                                | ✓                          | ✓                 |              |                       |                      | ✓                             |                       |
| Brännström M (2322)    |                               | ✓                            | ✓                  | ✓                             | ✓                  |                       |                |                   |                                  | ✓                          | ✓                 | ✓            | ✓                     | ✓                    | ✓                             | ✓                     |
| Hopp FP (2423)         |                               |                              | ✓                  |                               |                    |                       |                |                   |                                  |                            |                   | ✓            | ✓                     |                      | ✓                             |                       |
| Rogers JG (2524)       |                               | ✓                            | ✓                  | ✓                             | ✓                  | ✓                     | ✓              | ✓                 | ✓                                |                            |                   | ✓            |                       | ✓                    | ✓                             |                       |
| Sahlen KG (2625)       |                               | ✓                            | ✓                  | ✓                             | ✓                  |                       |                |                   |                                  | ✓                          | ✓                 | ✓            | ✓                     | ✓                    | ✓                             | ✓                     |
| Sidebottom AC (2726)   |                               | ✓                            | ✓                  | ✓                             | ✓                  | ✓                     | ✓              | ✓                 | ✓                                |                            |                   |              | ✓                     | ✓                    | ✓                             |                       |
| Wong FKY (2827)        |                               | ✓                            | ✓                  | ✓                             | ✓                  |                       |                |                   |                                  | ✓                          |                   | ✓            | ✓                     |                      | ✓                             |                       |
| Paes P (2928)          |                               | ✓                            | ✓                  | ✓                             | ✓                  | ✓                     |                |                   | ✓                                |                            | ✓                 |              | ✓                     |                      | ✓                             |                       |
| Bakitas M (3029)       |                               | ✓                            | ✓                  | ✓                             | ✓                  |                       |                |                   |                                  | ✓                          | ✓                 | ✓            |                       |                      | ✓                             | ✓                     |
| O'Donnell A (30)       |                               | ✓                            | ✓                  | ✓                             | ✓                  | ✓                     | ✓              | ✓                 | ✓                                |                            | ✓                 | ✓            | ✓                     | ✓                    | ✓                             | ✓                     |
| Johnson MJ (31)        |                               | ✓                            | ✓                  | ✓                             | ✓                  | ✓                     | ✓              | ✓                 | ✓                                |                            | ✓                 | ✓            | ✓                     | ✓                    | ✓                             | ✓                     |
| Tadwalkar R (3132)     |                               |                              | ✓                  | ✓                             |                    | ✓                     |                | ✓                 |                                  |                            |                   |              |                       |                      | ✓                             |                       |
| Connor SR (3233)       |                               | NR                           | NR                 | NR                            | NR                 | NR                    | NR             | NR                | NR                               | NR                         | NR                | NR           | NR                    | NR                   | NR                            | NR                    |
| Enguidanos SM (3334)   |                               | ✓                            | ✓                  |                               | ✓                  | ✓                     | ✓              | ✓                 |                                  |                            |                   | ✓            | ✓                     | ✓                    | ✓                             |                       |
| Pattenden JF (3435)    |                               | ✓                            | ✓                  |                               | ✓                  | ✓                     |                |                   | ✓                                |                            | ✓                 |              |                       |                      | ✓                             | ✓                     |
| Evangelista LS† (3536) |                               | ✓                            | ✓                  |                               | ✓                  | ✓                     |                |                   |                                  | ✓                          | ✓                 | ✓            | ✓                     | ✓                    | ✓                             |                       |
| Evangelista LS* (3637) |                               | ✓                            | ✓                  |                               | ✓                  | ✓                     | ✓              | ✓                 | ✓                                |                            |                   | ✓            | ✓                     | ✓                    | ✓                             |                       |
| Taylor GJ (3738)       |                               | ✓                            | ✓                  |                               | ✓                  | ✓                     | ✓              | ✓                 | ✓                                | ✓                          |                   |              | ✓                     | ✓                    | ✓                             |                       |
| Wong RC (3839)         |                               | ✓                            | ✓                  |                               | ✓                  |                       |                |                   | ✓                                | ✓                          |                   |              | ✓                     |                      | ✓                             |                       |
| Cassel JB (3940)       |                               | ✓                            | ✓                  | ✓                             | ✓                  | ✓                     | ✓              | ✓                 |                                  | ✓                          | ✓                 | ✓            | ✓                     | ✓                    | ✓                             | ✓                     |
| Evangelista LS (4041)  |                               | ✓                            | ✓                  | ✓                             | ✓                  | ✓                     | ✓              |                   | ✓                                |                            | ✓                 | ✓            | ✓                     |                      | ✓                             |                       |
| Blecker S (4142)       |                               | NR                           | NR                 | NR                            | NR                 | NR                    | NR             | NR                | NR                               | NR                         | NR                | NR           | NR                    | NR                   | NR                            | NR                    |

Supplementary table 4: Results of risk of bias assessment with the Cochrane Risk of Bias tool

| Study                                  | Adequate sequence generation? | Allocation concealment? | Blinding (participants and personnel) | Blinding (outcome assessors) | Incomplete outcome data addressed? | Free of selective reporting? |
|----------------------------------------|-------------------------------|-------------------------|---------------------------------------|------------------------------|------------------------------------|------------------------------|
| Aiken LS 2006 ( <del>21</del> 20)      | ✓                             | ✓                       | ✗                                     | ✓                            | ✗                                  | ✓                            |
| Bekelman DB 2015 ( <del>22</del> 21)   | ✓                             | ✓                       | ✗                                     | ✓                            | ✓                                  | ✓                            |
| Brännström M 2014 ( <del>23</del> 22)  | ✓                             | ✓                       | ✗                                     | ✗                            | ◇                                  | ✓                            |
| Hopp FP 2016 ( <del>24</del> 23)       | ◇                             | ◇                       | ✗                                     | ✗                            | ✓                                  | ✗                            |
| Rogers JG 2017 ( <del>25</del> 24)     | ✓                             | ◇                       | ✗                                     | ✗                            | ✓                                  | ✓                            |
| Sahlen KG 2015 ( <del>26</del> 25)     | ✓                             | ✓                       | ✗                                     | ✗                            | ✓                                  | ✓                            |
| Sidebottom AC 2015 ( <del>27</del> 26) | ◇                             | ◇                       | ✗                                     | ✗                            | ✓                                  | ✓                            |
| Wong FKY 2016 ( <del>28</del> 27)      | ✓                             | ✓                       | ✗                                     | ✓                            | ✓                                  | ✓                            |
| Paes P 2005* ( <del>29</del> 28)       | ✓                             | ✗                       | ✗                                     | ✗                            | ✗                                  | ✓                            |
| Bakitas M 2017 ( <del>30</del> 29)     | N/A                           | N/A                     | ✗                                     | ✗                            | ✓                                  | ✓                            |
| Tadwalkar R 2014 ( <del>31</del> 32)   | N/A                           | N/A                     | ✗                                     | ✗                            | ◇                                  | ✓                            |
| O'Donnell A 2018 (30)                  | ✓                             | ◇                       | ✗                                     | ◇                            | ✓                                  | ✓                            |

\* Derived from the full thesis on which the letter was based and not from the limited information in the published letter.

N/A = not applicable

Key: ✓ = low risk of bias, ✗ = high risk of bias, ◇ = risk of bias unclear

Supplementary table 5: Results of NOS risk of bias assessment for cohort studies

| Study                       | Representativeness of exposed cohort | Selection of non-exposed cohort | Ascertainment of exposure | Outcome of interest not present at start of study | Comparability of cohorts | Assessment of outcome | Length of follow up | Adequacy of follow up |
|-----------------------------|--------------------------------------|---------------------------------|---------------------------|---------------------------------------------------|--------------------------|-----------------------|---------------------|-----------------------|
| Connor SR 2007 (3233)       | ★                                    | ★                               | ★                         | ★                                                 | ★                        | ★                     | ★                   | ★                     |
| Enguidanos SM 2005 (3334)   | ★                                    | ★                               | ★                         | ★                                                 | ★                        | ★                     | ★                   | ★                     |
| Pattenden JF 2013 (3435)    | ★                                    | ★                               | ★                         | ★                                                 | ★                        | ★                     | ★                   | ★                     |
| Evangelista LS 2014† (3536) | ★                                    | ★                               | ★                         | ★                                                 | ★                        | ★                     | ★                   | ★                     |
| Evangelista LS 2014* (3637) | ★                                    | ★                               | ★                         | ★                                                 | ★                        | ★                     | ★                   | ★                     |
| Taylor GJ 2017 (3738)       | ★                                    | ★                               | ★                         | ★                                                 | ★                        | ★                     | ★                   | ★                     |
| Wong RC 2013 (3839)         | ★                                    | ★                               | ★                         | ★                                                 | ★                        | ★                     | ★                   | ★                     |
| Johnson MJ 2018* (31)       | ★                                    | ★                               | ★                         | ★                                                 | ★                        | ★                     | ★                   | ★                     |

Key: ★ = low risk of bias, ★ = high risk of bias, ★ = risk of bias unclear

\* Designed as a nonrandomised feasibility study rather than to examine outcomes, but methods more suited to quality appraisal as observational data.

Supplementary table 6: Results of NOS risk of bias assessment for case-control studies

| Study                                           | Adequate case definition | Representativeness of cases | Selection of controls | Definition of controls | Comparability of cases and controls | Ascertainment of exposure | Same method of ascertainment for cases and controls | Non-response rate |
|-------------------------------------------------|--------------------------|-----------------------------|-----------------------|------------------------|-------------------------------------|---------------------------|-----------------------------------------------------|-------------------|
| Cassel JB 2016 ( <del>39</del> <u>40</u> )      | ★                        | ★                           | ★                     | ★                      | ★                                   | ★                         | ★                                                   | ★                 |
| Evangelista LS 2012 ( <del>40</del> <u>41</u> ) | ★                        | ★                           | ★                     | ★                      | ★                                   | ★                         | ★                                                   | ★                 |

Key: ★ = low risk of bias, ★ = high risk of bias, ★ = risk of bias unclear

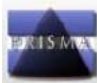

# PRISMA 2009 Checklist

1  
2  
3  
4  
5  
6  
7  
8  
9  
10  
11  
12  
13  
14  
15  
16  
17  
18  
19  
20  
21  
22  
23  
24  
25  
26  
27  
28  
29  
30  
31  
32  
33  
34  
35  
36  
37  
38  
39  
40  
41  
42  
43  
44  
45  
46  
47

| Section/topic                      | #  | Checklist item                                                                                                                                                                                                                                                                                              | Reported on page # |
|------------------------------------|----|-------------------------------------------------------------------------------------------------------------------------------------------------------------------------------------------------------------------------------------------------------------------------------------------------------------|--------------------|
| <b>TITLE</b>                       |    |                                                                                                                                                                                                                                                                                                             |                    |
| Title                              | 1  | Identify the report as a systematic review, meta-analysis, or both.                                                                                                                                                                                                                                         | 1,2,5              |
| <b>ABSTRACT</b>                    |    |                                                                                                                                                                                                                                                                                                             |                    |
| Structured summary                 | 2  | Provide a structured summary including, as applicable: background; objectives; data sources; study eligibility criteria, participants, and interventions; study appraisal and synthesis methods; results; limitations; conclusions and implications of key findings; systematic review registration number. | 2                  |
| <b>INTRODUCTION</b>                |    |                                                                                                                                                                                                                                                                                                             |                    |
| Rationale                          | 3  | Describe the rationale for the review in the context of what is already known.                                                                                                                                                                                                                              | 2, 3-4             |
| Objectives                         | 4  | Provide an explicit statement of questions being addressed with reference to participants, interventions, comparisons, outcomes, and study design (PICOS).                                                                                                                                                  | 5                  |
| <b>METHODS</b>                     |    |                                                                                                                                                                                                                                                                                                             |                    |
| Protocol and registration          | 5  | Indicate if a review protocol exists, if and where it can be accessed (e.g., Web address), and, if available, provide registration information including registration number.                                                                                                                               | 2,5                |
| Eligibility criteria               | 6  | Specify study characteristics (e.g., PICOS, length of follow-up) and report characteristics (e.g., years considered, language, publication status) used as criteria for eligibility, giving rationale.                                                                                                      | 5-6                |
| Information sources                | 7  | Describe all information sources (e.g., databases with dates of coverage, contact with study authors to identify additional studies) in the search and date last searched.                                                                                                                                  | 5                  |
| Search                             | 8  | Present full electronic search strategy for at least one database, including any limits used, such that it could be repeated.                                                                                                                                                                               | Supple table 1     |
| Study selection                    | 9  | State the process for selecting studies (i.e., screening, eligibility, included in systematic review, and, if applicable, included in the meta-analysis).                                                                                                                                                   | 6                  |
| Data collection process            | 10 | Describe method of data extraction from reports (e.g., piloted forms, independently, in duplicate) and any processes for obtaining and confirming data from investigators.                                                                                                                                  | 6                  |
| Data items                         | 11 | List and define all variables for which data were sought (e.g., PICOS, funding sources) and any assumptions and simplifications made.                                                                                                                                                                       | 6                  |
| Risk of bias in individual studies | 12 | Describe methods used for assessing risk of bias of individual studies (including specification of whether this was done at the study or outcome level), and how this information is to be used in any data synthesis.                                                                                      | 6-7                |
| Summary measures                   | 13 | State the principal summary measures (e.g., risk ratio, difference in means).                                                                                                                                                                                                                               | 7                  |
| Synthesis of results               | 14 | Describe the methods of handling data and combining results of studies, if done, including measures of consistency (e.g., I <sup>2</sup> ) for each meta-analysis                                                                                                                                           | 7                  |

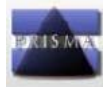

# PRISMA 2009 Checklist

Page 1 of 2

| Section/topic                 | #  | Checklist item                                                                                                                                                                                           | Reported on page #                     |
|-------------------------------|----|----------------------------------------------------------------------------------------------------------------------------------------------------------------------------------------------------------|----------------------------------------|
| Risk of bias across studies   | 15 | Specify any assessment of risk of bias that may affect the cumulative evidence (e.g., publication bias, selective reporting within studies).                                                             | 6-7                                    |
| Additional analyses           | 16 | Describe methods of additional analyses (e.g., sensitivity or subgroup analyses, meta-regression), if done, indicating which were pre-specified.                                                         | NA                                     |
| <b>RESULTS</b>                |    |                                                                                                                                                                                                          |                                        |
| Study selection               | 17 | Give numbers of studies screened, assessed for eligibility, and included in the review, with reasons for exclusions at each stage, ideally with a flow diagram.                                          | 7 - 8                                  |
| Study characteristics         | 18 | For each study, present characteristics for which data were extracted (e.g., study size, PICOS, follow-up period) and provide the citations.                                                             | 8                                      |
| Risk of bias within studies   | 19 | Present data on risk of bias of each study and, if available, any outcome level assessment (see item 12).                                                                                                | 19, 20 and<br>supple<br>tables 3<br>&4 |
| Results of individual studies | 20 | For all outcomes considered (benefits or harms), present, for each study: (a) simple summary data for each intervention group (b) effect estimates and confidence intervals, ideally with a forest plot. | 20 -22                                 |
| Synthesis of results          | 21 | Present results of each meta-analysis done, including confidence intervals and measures of consistency.                                                                                                  | NA                                     |
| Risk of bias across studies   | 22 | Present results of any assessment of risk of bias across studies (see Item 15).                                                                                                                          | 19, 20 and<br>supple<br>tables 3<br>&4 |
| Additional analysis           | 23 | Give results of additional analyses, if done (e.g., sensitivity or subgroup analyses, meta-regression [see Item 16]).                                                                                    | NA                                     |
| <b>DISCUSSION</b>             |    |                                                                                                                                                                                                          |                                        |
| Summary of evidence           | 24 | Summarize the main findings including the strength of evidence for each main outcome; consider their relevance to key groups (e.g., healthcare providers, users, and policy makers).                     | 23-24                                  |
| Limitations                   | 25 | Discuss limitations at study and outcome level (e.g., risk of bias), and at review-level (e.g., incomplete retrieval of identified research, reporting bias).                                            | 24-25                                  |
| Conclusions                   | 26 | Provide a general interpretation of the results in the context of other evidence, and implications for future research.                                                                                  | 26-27                                  |

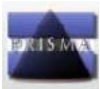

# PRISMA 2009 Checklist

|         |    |                                                                                                                                            |  |    |
|---------|----|--------------------------------------------------------------------------------------------------------------------------------------------|--|----|
| FUNDING |    |                                                                                                                                            |  |    |
| Funding | 27 | Describe sources of funding for the systematic review and other support (e.g., supply of data); role of funders for the systematic review. |  | 28 |

From: Moher D, Liberati A, Tetzlaff J, Altman DG, The PRISMA Group (2009). Preferred Reporting Items for Systematic Reviews and Meta-Analyses: The PRISMA Statement. PLoS Med 6(6): e1000097. doi:10.1371/journal.pmed1000097

For more information, visit: [www.prisma-statement.org](http://www.prisma-statement.org).

For Peer Review
